# Supplementary material for: TMEM79/MATTRIN defines a pathway for Frizzled regulation and is required for Xenopus embryogenesis
Source: eLife. 2020 Sep 14;9:e56793. doi: 10.7554/eLife.56793 (PMC7521923; doi:10.7554/eLife.56793)
Supplement: Figure 1—source data 1. [file elife-56793-fig1-data1.xlsx]

## Sheet: Replicate 1
Gene	Total sgRNAs	Unique
ZNRF3	470	5
FAM177A1	2374	4
TMEM79	503	4
DEFB118	500	4
OLFML3	106	4
CSNK1A1	69	4
OR2B3	5	4
TMPRSS13	5	4
ZNF585A	162590	3
APC	13753	3
LDLRAD1	10355	3
MLC1	3886	3
VOPP1	3563	3
LOH12CR1	3339	3
ABCC3	2374	3
TRAF3IP1	1844	3
EIF5AL1	1795	3
CCL7	1508	3
CTC1	1361	3
C7orf25	975	3
NELL2	953	3
NT5C1B-RDH14	943	3
MMP8	706	3
ANKRD13C	607	3
TMX4	526	3
TAX1BP3	521	3
C22orf24	472	3
THNSL2	465	3
CLEC12A	382	3
PQLC2	326	3
SPARC	326	3
ELN	243	3
TAS2R20	216	3
ZNF267	211	3
LRTOMT	204	3
C10orf76	146	3
DHCR7	135	3
RNF182	90	3
FAM73A	87	3
DAGLA	85	3
CYB5R4	63	3
ITGAD	61	3
FXR2	44	3
L3MBTL2	24	3
IFT20	21	3
USP7	21	3
NOTCH1	20	3
EED	20	3
SLC35C1	18	3
ENAH	12	3
C16orf45	11	3
RBM11	11	3
INTU	11	3
GRIA1	9	3
MTFR1	7	3
NCMAP	6	3
PCDH11X	6	3
HINT2	6	3
APMAP	5	3
GAS2	5	3
CTH	5	3
KLRK1	5	3
DAPK3	5	3
GAS2L3	5	3
NRAP	4	3
STPG2	4	3
SRRM2	4	3
KBTBD7	4	3
GOT1L1	4	3
TMEM246	4	3
C7orf57	4	3
ZNF236	4	3
GPATCH1	4	3
C7orf29	3	3
AGPAT9	3	3
BDNF	3	3
RDH8	3	3
EFCAB13	3	3
NPTN	3	3
C9orf41	3	3
SMARCA4	3	3
NGFR	3	3
UBE2E3	3	3
GBF1	146861	2
RNASE7	102171	2
CYP46A1	92096	2
MYO1G	57450	2
MRPL1	41678	2
hsa-mir-618	39214	2
JRKL	31857	2
A4GNT	21614	2
HIVEP2	16782	2
SNF8	15137	2
TCN2	12182	2
MDK	11382	2
RASEF	11073	2
ZBTB46	10670	2
TMEM168	9974	2
FBXO36	9526	2
CGN	9029	2
CSNK1G2	8382	2
AK7	8195	2
SPANXD	8067	2
C5orf24	7753	2
RPL28	7696	2
B3GALT5	7389	2
KLHDC2	6415	2
RPS6	5313	2
PPP1R15B	5247	2
C17orf78	5242	2
GAK	5008	2
XKRY	4684	2
COMMD7	4428	2
SCN3A	4379	2
AMOTL1	4333	2
DENND1C	4291	2
VAMP1	4141	2
hsa-mir-200a	4105	2
ST6GALNAC1	3980	2
KRTAP24-1	3869	2
OR14C36	3598	2
RPRD1A	3503	2
hsa-mir-4509-1	3351	2
MAPKAPK3	3176	2
IGFL2	2970	2
HOXC12	2963	2
C17orf51	2890	2
KCNG4	2819	2
VKORC1L1	2800	2
BTBD8	2781	2
SMAD4	2620	2
ADAT1	2449	2
C3orf83	2364	2
FIZ1	1932	2
TIMD4	1795	2
GARNL3	1751	2
PCDH15	1748	2
CTNNBL1	1745	2
HMGCL	1731	2
ZSWIM2	1532	2
hsa-mir-3910-2	1517	2
TRIM15	1492	2
MITF	1399	2
OTUD5	1343	2
CD320	1342	2
PNPT1	1322	2
GRIN2B	1313	2
TAS2R19	1295	2
ANXA8	1274	2
ADPRHL2	1242	2
CMTM8	1210	2
CYP2F1	1191	2
KANSL1	1188	2
CCNA2	1125	2
FTO	1086	2
RPS25	1072	2
C19orf73	1059	2
TMEM97	1048	2
hsa-mir-6505	1008	2
CCDC15	1007	2
COX7A1	988	2
OR10A7	893	2
LRRN2	880	2
C10orf137	874	2
WTH3DI	862	2
NIPA2	857	2
FLNA	847	2
WIF1	842	2
CNP	792	2
IFI44L	788	2
RIMBP3C	764	2
ARPP21	754	2
CIDEB	748	2
CRTAP	740	2
SPATA33	738	2
PKHD1	722	2
FARP2	721	2
RND2	698	2
GPRIN1	695	2
PCGF6	648	2
ASPA	628	2
SLC22A5	572	2
hsa-mir-4666a	567	2
PRDM10	558	2
GPR108	557	2
HIST1H2BB	533	2
PXDC1	527	2
OVGP1	525	2
ABTB2	511	2
LMO7	510	2
CLDN24	471	2
SLC6A5	456	2
CKAP4	451	2
SLC7A2	449	2
CHGB	429	2
HDLBP	423	2
TMEM198	416	2
TOX2	411	2
TRIM69	407	2
CREB3L3	393	2
TUBGCP2	384	2
ENO4	380	2
FAM50A	379	2
FCGR2A	375	2
C7orf55-LUC7L2	370	2
OR6T1	338	2
SERINC3	323	2
PPAP2B	322	2
LGALS14	310	2
hsa-mir-5584	305	2
C19orf40	304	2
EPCAM	295	2
ERAP1	289	2
UBR4	280	2
LEO1	273	2
ERC1	257	2
C9orf3	251	2
CTNNA3	248	2
SPG7	245	2
DPYS	244	2
PLEKHA8	237	2
UBE2L3	234	2
C1orf186	233	2
DTWD2	232	2
NR1H3	232	2
CLGN	231	2
XPR1	226	2
RABEP1	224	2
hsa-mir-6752	218	2
PPP1R3D	216	2
MC1R	203	2
TAF4B	201	2
LDB3	199	2
MED8	198	2
OPA1	191	2
NPIPL3	185	2
PCDHB13	185	2
hsa-mir-4783	182	2
BTLA	180	2
ENTPD7	179	2
CEP68	179	2
C1orf123	175	2
CMIP	173	2
USP17L20	169	2
CERS4	163	2
FAM13C	162	2
TLR2	154	2
SEPHS1	153	2
IZUMO2	152	2
RIMS4	151	2
WIPI1	147	2
TMEM211	145	2
UBE3C	143	2
DNTT	142	2
SCARA5	140	2
CLIP4	138	2
PREX2	132	2
RPP30	131	2
ARSB	130	2
ARAP1	129	2
AIFM3	129	2
TMEM74	119	2
hsa-mir-744	118	2
PPM1H	113	2
SLC30A5	111	2
SEC14L3	110	2
RHBDL2	110	2
hsa-mir-219a-1	109	2
VGLL3	108	2
GADL1	106	2
PLSCR2	105	2
ZNF597	104	2
PDZD4	103	2
LRRC57	103	2
SFMBT2	97	2
GPR149	96	2
ZNF630	96	2
ATF1	92	2
SPTBN4	91	2
HAUS3	90	2
COMMD8	88	2
FARP1	88	2
C2orf88	87	2
DEFB126	87	2
SLC7A10	86	2
VN1R1	84	2
GPBP1	84	2
CACNB4	82	2
RTP1	81	2
C6orf1	81	2
JUND	77	2
DPP9	74	2
GLP1R	73	2
PCNT	72	2
TSPAN31	71	2
CMTM6	70	2
NLRP10	64	2
ASAP1	63	2
EPT1	62	2
SLC50A1	62	2
ACSL1	61	2
GTF3A	60	2
PDP2	59	2
CEL	57	2
SLC1A6	56	2
ASGR1	56	2
RPL8	55	2
TTC39C	54	2
NME5	51	2
GAPDHS	49	2
FERD3L	49	2
CHCHD4	47	2
hsa-mir-545	46	2
DDX39A	46	2
LRRC56	46	2
IL11RA	45	2
RTP2	45	2
POU2F2	44	2
FAM208A	42	2
C2	41	2
CTIF	41	2
HAAO	41	2
PYGO1	40	2
KCNC4	40	2
OR14I1	40	2
TMEM150C	38	2
TGFB1	36	2
C19orf81	35	2
TOR1AIP2	35	2
ADAMTS5	34	2
CCDC158	34	2
SNX25	34	2
C1orf227	33	2
hsa-mir-569	32	2
PIGM	32	2
OR5B3	31	2
NCALD	31	2
GRK1	30	2
LRBA	29	2
TAX1BP1	29	2
AGBL3	28	2
PPP2R3B_X	28	2
NOD1	28	2
TUFT1	26	2
EGF	25	2
ENPP7	24	2
KYNU	24	2
RNF138	22	2
C5orf55	22	2
GSTO2	22	2
LAIR1	22	2
SERTAD1	21	2
SHROOM4	21	2
FAM127A	21	2
POTEB2	20	2
hsa-mir-4440	20	2
TAAR5	20	2
PSMD10	20	2
MPST	19	2
GAD1	19	2
GMPR2	19	2
CBR4	19	2
RELN	18	2
CPNE4	18	2
SCN10A	18	2
MRC2	17	2
NCAN	16	2
MAGEA8	15	2
TRMT10C	14	2
SH3GL2	14	2
HEPN1	13	2
SLC25A10	13	2
USP22	12	2
ZNF25	12	2
hsa-mir-628	11	2
CSNK1G3	11	2
ACTL7A	11	2
CHRND	11	2
TNFRSF1A	10	2
WNT9A	10	2
LPHN3	10	2
UAP1L1	10	2
OR2B11	10	2
PGAP2	10	2
hsa-mir-4646	9	2
hsa-mir-942	9	2
hsa-mir-5089	9	2
ANKRD12	9	2
UXS1	9	2
ST3GAL6	9	2
TRIM65	9	2
UTP14C	9	2
TSHZ3	9	2
LGALS9B	9	2
LOC100129636	9	2
C19orf24	9	2
KRT36	8	2
GLIS3	8	2
C7orf65	8	2
CREB5	8	2
CST4	8	2
IWS1	8	2
hsa-mir-3170	7	2
hsa-mir-3714	7	2
hsa-mir-526b	7	2
ZNF385A	7	2
IL13RA2	7	2
TMEM61	7	2
HSPA1L	7	2
FEZF1	7	2
TRIM77	7	2
IFNA6	7	2
TADA2B	7	2
CDRT15L2	7	2
WDR52	7	2
EPHA8	7	2
GNAT2	7	2
KCNMB4	7	2
ENG	7	2
FRG2B	6	2
HCN3	6	2
SPATA13	6	2
NUAK2	6	2
C19orf18	6	2
ANHX	6	2
TRIM52	6	2
DIO1	6	2
C4orf22	6	2
SLC25A31	6	2
CDK2AP2	6	2
C19orf45	6	2
CHTF8	6	2
SIPA1L2	6	2
CNN2	6	2
RAB3IL1	6	2
MPV17L2	6	2
KLRC2	6	2
XAGE1A	5	2
TBC1D32	5	2
EDC4	5	2
SNX15	5	2
ELL3	5	2
BRD1	5	2
C7orf71	5	2
CLN6	5	2
FA2H	5	2
OR4F6	5	2
DMC1	5	2
DENND4A	5	2
NMRK2	5	2
HSPB3	5	2
KRTAP22-2	5	2
SYT4	5	2
ATP13A5	5	2
WRAP73	5	2
CCDC142	5	2
CPA1	5	2
HSD17B14	5	2
NUDT18	5	2
GBAS	5	2
RSPO1	5	2
GSTA1	5	2
C15orf48	5	2
LCE3D	5	2
ZFYVE28	5	2
SULF2	5	2
PRKAR1B	5	2
HAUS4	5	2
JDP2	5	2
APOA4	5	2
GLMN	5	2
ANXA2	5	2
hsa-mir-5004	4	2
DOCK7	4	2
MSTN	4	2
LYPD4	4	2
LTB4R	4	2
MCM8	4	2
ZNF844	4	2
HUS1B	4	2
ACTN2	4	2
ATG9A	4	2
CD68	4	2
CXCL2	4	2
ZNF827	4	2
VWA3B	4	2
IGSF1	4	2
RERG	4	2
EIF3H	4	2
PGC	4	2
C9orf153	4	2
NHLRC1	4	2
STAB2	4	2
ITGAE	4	2
FBXO9	4	2
PSG6	4	2
RHO	4	2
GALK1	4	2
KRT4	4	2
TBX4	4	2
KLC3	4	2
RAB20	4	2
FAM98C	4	2
CA5B	4	2
HAO2	4	2
FAM219A	4	2
HECW2	4	2
C6orf62	4	2
MTRR	4	2
HSPB1	4	2
SH3BGRL3	4	2
PLAC4	4	2
APOBR	4	2
CHRM2	4	2
CGB	3	2
hsa-mir-300	3	2
hsa-mir-4802	3	2
hsa-mir-548s	3	2
hsa-mir-548at	3	2
hsa-mir-642a	3	2
PPIAL4A	3	2
FAM47E	3	2
RASA4	3	2
UGT2A2	3	2
MSX1	3	2
CNTN3	3	2
CSNK1E	3	2
RPL3L	3	2
PSKH1	3	2
COPRS	3	2
GHDC	3	2
SCN1B	3	2
MET	3	2
CD70	3	2
RNF150	3	2
TMEM37	3	2
PPY	3	2
MOSPD1	3	2
CEACAM7	3	2
GALNT3	3	2
TMEM248	3	2
ZNF77	3	2
NADK	3	2
TMEM205	3	2
AGBL1	3	2
SGSM2	3	2
CRY2	3	2
GABARAPL2	3	2
JAKMIP3	3	2
SBNO2	3	2
CCL11	3	2
TCEAL2	3	2
MS4A6E	3	2
ACPT	3	2
HMGN3	3	2
CLRN2	3	2
PVRL4	3	2
CDCP2	3	2
ZFYVE21	3	2
ZNF285	3	2
SDCBP	3	2
DNAJC13	3	2
MFSD8	3	2
CCDC135	3	2
UBL4A	3	2
GPR32	3	2
PRR11	3	2
SYNC	3	2
ALDOC	3	2
CHST9	3	2
COPS7A	3	2
RGL3	3	2
YBX2	3	2
MIS18A	3	2
PDE7A	3	2
PHF7	3	2
TYK2	3	2
ALOX12B	3	2
CCR1	3	2
STC2	3	2
COMMD6	3	2
GABRA6	3	2
ZNF470	3	2
CC2D2A	3	2
PHKA1	3	2
BLCAP	3	2
ST3GAL1	3	2
CNGA2	3	2
SLC13A3	3	2
TMEM125	3	2
EGFL8	3	2
PITPNC1	3	2
TNFAIP2	3	2
ZNHIT1	3	2
ECSIT	3	2
OR10H1	3	2
CLIP1	3	2
PRDX6	3	2
RRP8	3	2
MPP3	3	2
SAMD14	3	2
QDPR	3	2
SGPL1	3	2
NLRX1	3	2
CORO7-PAM16	3	2
VSIG4	3	2
SZT2	3	2
SEZ6	3	2
ABCG4	3	2
RPA4	3	2
C17orf50	3	2
RGS6	3	2
OR11H2	3	2
CILP2	3	2
P2RX4	3	2
KRTAP9-7	3	2
CPNE1	3	2
PARD6G	3	2
ZNF793	3	2
HMCN1	3	2
SLFN13	3	2
GANAB	3	2
C17orf59	3	2
COL5A2	3	2
TRAPPC6B	3	2
GJC2	3	2
CXCL10	3	2
ZFP91	3	2
PLCG2	3	2
IL3RA_Y	2	2
hsa-mir-4747	2	2
hsa-mir-4434	2	2
hsa-mir-4513	2	2
hsa-mir-487b	2	2
IQCJ-SCHIP1	2	2
hsa-mir-373	2	2
hsa-mir-4649	2	2
hsa-mir-4418	2	2
hsa-mir-1247	2	2
hsa-mir-4439	2	2
hsa-mir-4437	2	2
FTSJD1	2	2
HBG1	2	2
UQCC2	2	2
CAPN15	2	2
RANBP2	2	2
HIST1H4J	2	2
BSPH1	2	2
JMJD4	2	2
RB1CC1	2	2
HIST1H2BD	2	2
CDON	2	2
SPATA5L1	2	2
EFEMP2	2	2
C17orf102	2	2
OSBPL7	2	2
CDIP1	2	2
TMEM60	2	2
EBF1	2	2
NTN3	2	2
COLGALT1	2	2
FKBP9	2	2
CYB5A	2	2
OXSR1	2	2
DNAI2	2	2
FAM153A	2	2
ABCC6	2	2
ZNF136	2	2
RTP4	2	2
BECN1	2	2
XPC	2	2
SYNGAP1	2	2
IRF8	2	2
SLC2A4	2	2
DNASE1L2	2	2
MPPED2	2	2
C1orf105	2	2
ZNF692	2	2
TMEM127	2	2
SLCO1A2	2	2
DCAF8	2	2
ZNF711	2	2
TLR6	2	2
PMAIP1	2	2
TSEN54	2	2
MACF1	2	2
NLRP1	2	2
LMCD1	2	2
ABCA7	2	2
ECHDC3	2	2
HNRNPUL1	2	2
PAWR	2	2
CTCFL	2	2
ABCC2	2	2
CTSB	2	2
BNIP2	2	2
EP400	2	2
CYP4A11	2	2
CLN5	2	2
ABCC11	2	2
RAB19	2	2
TRMT61B	2	2
TAOK1	2	2
ESF1	2	2
SNAP29	2	2
ADCY3	2	2
C16orf58	2	2
RNF219	2	2
SCRN2	2	2
ZNF524	2	2
LY6H	2	2
RNF44	2	2
MYO1D	2	2
WBSCR22	2	2
CAPN1	2	2
MYO19	2	2
OR6M1	2	2
DBX2	2	2
KIF27	2	2
BPIFA2	2	2
PCIF1	2	2
PYDC1	2	2
HLA-A	2	2
TRIM7	2	2
MFNG	2	2
AKAP10	2	2
LOC100130370	2	2
TSPAN13	2	2
ZC3HAV1L	2	2
LOX	2	2
SEMA4D	2	2
MBL2	2	2
CNOT7	2	2
NRTN	2	2
ZNF541	2	2
FETUB	2	2
ARHGAP44	2	2
FAM184A	2	2
FAIM3	2	2
LRP12	2	2
SLC25A17	2	2
RNF216	2	2
ABCC10	2	2
MTERFD3	2	2
AFF3	2	2
RBBP9	2	2
C18orf63	2	2
PARD3	2	2
GATAD2A	2	2
ATRAID	2	2
PDHA2	2	2
SLC22A1	2	2
ERCC2	2	2
FCN3	2	2
MED16	2	2
LRP6	2	2
ZNF639	2	2
GOLGA1	2	2
OR5F1	2	2
PPM1N	2	2
C3orf43	2	2
RELB	2	2
ADAMTS14	2	2
POU6F2	2	2
VAMP5	2	2
CABLES1	2	2
ERAS	2	2
WDYHV1	2	2
SOGA2	2	2
VWA2	2	2
LEPROT	2	2
ANKRD30B	2	2
GZMM	2	2
TMEM200B	2	2
C5AR1	2	2
QKI	2	2
OR13H1	2	2
DEFB114	2	2
PFKL	2	2
CAMTA1	2	2
ACOXL	2	2
MGAM	2	2
TMEM138	2	2
UTY	2	2
SENP1	2	2
KCNIP3	2	2
AFAP1L2	2	2
MLLT4	2	2
UROD	2	2
INTS10	2	2
TMEM223	2	2
SHH	2	2
ERGIC1	2	2
OPRM1	2	2
ATMIN	2	2
RBM43	2	2
GTF2F1	2	2
ABCC8	2	2
CSDC2	2	2
ARL6	2	2
CNTN6	2	2
LAMTOR4	2	2
KRTAP1-4	2	2
TRIB1	2	2
KATNAL2	2	2
CRP	2	2
ZNF484	2	2
PRM3	2	2
ENPP5	2	2
TM6SF2	2	2
NXT2	2	2
ITIH4	2	2
ZNF835	2	2
TRIM72	2	2
NCL	2	2
CACNA1D	2	2
PREB	2	2
MYOZ2	2	2
DNAJB7	2	2
GCLC	2	2
CECR2	2	2
RIT1	2	2
LDHC	2	2
NCKAP5	2	2
FAM209B	2	2
ADTRP	2	2
GPA33	2	2
FAF2	2	2
ARHGEF10L	2	2
FBRSL1	2	2
WNK4	2	2
ADCY2	2	2
SLC22A23	2	2
CCDC169	2	2
GALNT15	2	2
APOOL	2	2
MROH6	2	2
OR7G3	2	2
SRSF9	2	2
TPRA1	2	2
IL12RB2	2	2
PSIP1	2	2
RBFOX2	2	2
OR2L3	2	2
GREM2	2	2
KATNA1	2	2
MCF2L2	2	2
LYZL6	2	2
PWWP2B	2	2
ATXN10	2	2
HTR1A	2	2
RHOXF2	2	2
ARPC1B	2	2
CDKN2C	2	2
TENM2	2	2
OR10H5	2	2
CACUL1	2	2
KRTAP5-5	2	2
GFAP	2	2
DYRK3	2	2
GLA	2	2
SSPN	2	2
SYVN1	2	2
IL1R2	2	2
SPP1	2	2
COA3	2	2
EDEM1	2	2
MSI2	2	2
FZD7	2	2
BCAP31	2	2
ZNF287	2	2
SEC24D	2	2
MYOCD	2	2
KRT33A	2	2
LYL1	2	2
SLC46A1	2	2
AXIN2	2	2
SNX21	2	2
TCF19	2	2
MCRS1	2	2
ARFGAP3	182479	1
CLOCK	149918	1
CDK15	127355	1
CHST4	83651	1
EPHA2	66492	1
hsa-mir-3935	59529	1
SLC2A6	57161	1
FAM110B	53928	1
ADAM8	49907	1
TIGIT	49803	1
NonTargetingControlGuideForHuman_0764	48836	1
FOXI1	44900	1
TPRKB	41991	1
PTPMT1	41307	1
TOP2B	39738	1
ACAP2	39713	1
MMP28	37449	1
LACTB	30082	1
BCL2	26336	1
BMPER	25466	1
HOXC8	24688	1
UBXN10	24645	1
NonTargetingControlGuideForHuman_0790	24351	1
FAM71F1	24096	1
RELL1	20490	1
CPLX1	20042	1
USP14	19921	1
ZNF239	19864	1
DFFA	19356	1
STYXL1	18814	1
FHDC1	18373	1
NRL	16663	1
VPS45	15149	1
hsa-let-7f-1	15015	1
LRIT3	14632	1
CCR4	14170	1
hsa-mir-6513	13971	1
SLC35A3	12616	1
IL6R	12602	1
PALM2	12375	1
hsa-mir-521-2	11123	1
ANXA10	10980	1
LEMD2	10027	1
hsa-mir-2113	9893	1
STAT4	9890	1
TRAPPC1	9714	1
CD1B	9614	1
TPCN2	9444	1
OTP	9041	1
PAQR8	8912	1
LSR	8573	1
ZNF254	8262	1
CCDC170	8064	1
hsa-mir-4720	7951	1
SPRYD3	7560	1
SPDYE2B	7548	1
TIMM10	7278	1
CDH24	7148	1
NFATC2	7147	1
RECQL	7138	1
NUP98	6983	1
SOX15	6881	1
LAT	6817	1
OR13J1	6787	1
FBXO8	6465	1
PATZ1	6458	1
CRYBA1	6430	1
DKK4	6420	1
GNPAT	6271	1
MADD	5922	1
CCL4L2	5846	1
VARS	5784	1
RAB36	5602	1
ZNF248	5535	1
ANKFY1	5469	1
IRX5	5159	1
NonTargetingControlGuideForHuman_0961	4920	1
ZNF775	4888	1
E2F4	4885	1
TRAP1	4842	1
DEF6	4836	1
RP2	4760	1
HS1BP3	4722	1
NonTargetingControlGuideForHuman_0916	4672	1
PRMT2	4582	1
SPTLC2	4479	1
MYEF2	4475	1
SLC25A19	4454	1
RPS3	4435	1
LY86	4238	1
NDUFB1	4236	1
AMIGO2	4234	1
B4GALT1	4218	1
DLGAP1	4168	1
DMRTC1	4122	1
HHIPL1	3928	1
PAFAH2	3882	1
TREML1	3836	1
RPP25	3820	1
TAS2R39	3689	1
CYP4F8	3583	1
BTK	3569	1
KCNMB2	3514	1
ROBO4	3514	1
NDUFV3	3502	1
SLC36A3	3455	1
MOK	3443	1
RFPL4B	3388	1
POLH	3360	1
KIAA1841	3337	1
SLC38A8	3312	1
MYRIP	3289	1
C19orf48	3276	1
TXNL1	3179	1
IL18RAP	3049	1
KBTBD12	3022	1
SMIM12	3013	1
hsa-mir-1260b	2994	1
JARID2	2983	1
GCNT2	2956	1
DCD	2945	1
FGF3	2898	1
AGK	2883	1
HEXDC	2794	1
NRGN	2792	1
MCM2	2791	1
CIR1	2768	1
FKBP1B	2749	1
RPUSD4	2716	1
LAPTM5	2706	1
PCDHA2	2674	1
DAK	2669	1
COQ4	2637	1
hsa-mir-3609	2592	1
OR5AN1	2533	1
KIAA1598	2521	1
ZDHHC14	2486	1
HDGFRP3	2463	1
FAM65C	2456	1
RXFP4	2440	1
SOAT1	2422	1
RASSF1	2391	1
TBC1D12	2384	1
CHDC2	2366	1
BUD31	2338	1
TTYH2	2323	1
hsa-mir-4793	2277	1
ESPN	2228	1
TMEM39A	2210	1
ALKBH3	2172	1
CHKB	2153	1
KRTAP5-4	2140	1
SLC9A8	2130	1
AGPAT6	2129	1
ANKEF1	2060	1
CFI	2045	1
hsa-mir-196a-2	2044	1
MLYCD	2039	1
OR2M4	2017	1
ONECUT1	2004	1
KCNT1	1989	1
OR10K2	1916	1
hsa-mir-4468	1911	1
UBE4B	1898	1
THAP6	1873	1
NonTargetingControlGuideForHuman_0377	1869	1
hsa-mir-135b	1859	1
CNPY3	1808	1
RPP14	1782	1
hsa-mir-4503	1776	1
ZNF517	1773	1
SAPCD1	1723	1
CBLN4	1721	1
PAQR6	1720	1
SELT	1705	1
MLH1	1699	1
ZFP92	1688	1
OR10H4	1670	1
C1orf54	1618	1
RPTOR	1608	1
SNAPC3	1603	1
GCG	1588	1
POLR3B	1580	1
NPAT	1541	1
NELFB	1535	1
EYA1	1525	1
ABCF3	1497	1
hsa-mir-640	1469	1
TBC1D15	1404	1
TRIM34	1401	1
CPNE5	1389	1
DRP2	1362	1
POGZ	1344	1
ATXN3L	1320	1
MBD1	1310	1
RASA2	1293	1
hsa-mir-6782	1278	1
DARS	1277	1
SIX6	1274	1
NDUFS5	1266	1
FDFT1	1251	1
ZNF391	1251	1
CEP350	1219	1
PLXNA2	1213	1
ENOSF1	1211	1
TRIM54	1206	1
hsa-mir-1265	1190	1
hsa-mir-1264	1187	1
MBD2	1167	1
TRIM32	1151	1
hsa-mir-6767	1120	1
RALGAPA1	1118	1
ZNF784	1117	1
CHI3L1	1110	1
UBR3	1107	1
hsa-mir-4279	1088	1
ZNF177	1070	1
TTLL5	1055	1
ADH1B	1051	1
ZNF140	1049	1
FAM127C	1029	1
DAAM1	1024	1
SDC4	1020	1
ICOSLG	1018	1
AKAP5	1005	1
CCDC41	1005	1
OR1N2	997	1
GLRX	994	1
BNC2	986	1
NKAIN3	986	1
FEM1B	983	1
CD24	980	1
CYP19A1	976	1
FOXS1	967	1
TINF2	965	1
PABPC1L2A	952	1
C10orf107	951	1
C17orf77	934	1
MILR1	929	1
WDR27	920	1
GPANK1	907	1
EVA1C	905	1
POC1B	896	1
hsa-mir-6836	892	1
SMCR7	889	1
YPEL3	889	1
C1orf159	882	1
CUEDC1	880	1
NCDN	872	1
GPRIN3	865	1
C5orf60	862	1
hsa-mir-548f-2	859	1
CERCAM	853	1
OTUD6A	849	1
C11orf74	838	1
ARHGAP22	837	1
MLEC	832	1
KBTBD6	831	1
ALPI	827	1
hsa-mir-6868	813	1
PRB3	812	1
BRSK1	811	1
NBL1	777	1
hsa-mir-5682	766	1
FGF11	765	1
LENEP	765	1
GFRAL	763	1
CCDC101	763	1
KLHL13	761	1
INTS3	735	1
DENND6B	734	1
KLF15	730	1
FAM5C	726	1
MCAM	723	1
PDLIM4	721	1
GTSF1	714	1
FDPS	709	1
FOLH1	705	1
GAGE2A	696	1
TSEN34	693	1
CCDC122	690	1
OR1L4	688	1
EIF4G3	688	1
UCN	685	1
RNASEK	676	1
hsa-mir-6773	672	1
ADORA2A	669	1
MTFR1L	668	1
STYX	663	1
ANKRD17	642	1
PRKAA2	642	1
GOLT1A	637	1
TRIM49C	633	1
RSRC1	633	1
APEH	631	1
hsa-mir-497	629	1
hsa-mir-340	615	1
PRDM11	613	1
PMEPA1	608	1
COL6A3	606	1
RNASE2	605	1
KRT28	598	1
hsa-mir-4432	594	1
NonTargetingControlGuideForHuman_0274	590	1
GOLGA4	589	1
SPANXN3	588	1
LCE1C	585	1
TIMM23	582	1
hsa-mir-544a	573	1
TCEB3CL	572	1
CCNH	565	1
SLC25A21	561	1
WFIKKN1	558	1
RNF181	553	1
hsa-mir-146a	547	1
SCLT1	547	1
CCDC144NL	546	1
SPRR2B	544	1
AK8	540	1
NMUR1	537	1
ZNF618	537	1
hsa-mir-2115	533	1
PALLD	533	1
MICALL2	532	1
CDC42EP5	528	1
MRPL10	512	1
OR6F1	510	1
LHFPL1	508	1
hsa-mir-493	500	1
KRBA2	500	1
BRICD5	499	1
CHRNA6	498	1
FAM25C	494	1
RALB	494	1
CSF2RB	492	1
ODC1	489	1
GNGT1	486	1
HARS	483	1
CACNA1I	478	1
USPL1	478	1
DAW1	469	1
ATP6V0A1	465	1
KLK2	462	1
IQCH	456	1
KIAA0922	449	1
STK19	448	1
MORN2	447	1
CNPY4	446	1
SHROOM1	444	1
MSMB	440	1
SQSTM1	439	1
NXF2	436	1
NME8	435	1
C12orf65	434	1
ZIM3	428	1
ANKMY1	426	1
CTXN2	423	1
ZACN	422	1
IHH	420	1
GOLGA7	418	1
C9orf142	413	1
PHOSPHO1	411	1
DZANK1	411	1
TJAP1	411	1
RAB3B	409	1
ADAM20	402	1
hsa-mir-6511a-1	399	1
OR1A2	397	1
PSMG4	395	1
APOC1	395	1
TRAFD1	394	1
GSG1L	394	1
hsa-mir-711	391	1
PCDHB7	390	1
MSANTD2	383	1
PAK7	382	1
TRAPPC11	381	1
ALX3	380	1
CBX8	378	1
PNPLA6	378	1
TMEM86B	372	1
STARD5	368	1
CFTR	366	1
ODF3B	366	1
hsa-mir-449b	365	1
WDR54	363	1
TBC1D5	360	1
AVEN	359	1
TESPA1	359	1
GPR137	355	1
HIST1H3E	353	1
C14orf37	350	1
DACH2	346	1
LOC728819	346	1
hsa-mir-4269	344	1
CCNB1	342	1
C1orf151-NBL1	339	1
TUBGCP3	337	1
OR51B6	336	1
MRRF	336	1
TMEM63C	336	1
ZNF460	335	1
ARHGEF25	334	1
CPT2	330	1
URB1	330	1
TTYH1	327	1
ZNF584	327	1
PABPN1L	326	1
ELMSAN1	326	1
GOLGA6A	323	1
PFKP	323	1
ISM2	323	1
BTN3A2	322	1
SFTA3	314	1
NXF5	314	1
SIAH1	311	1
DCDC2	310	1
MEIS1	310	1
TAF13	306	1
ATP10A	305	1
ZBTB33	301	1
AGPS	299	1
RASSF4	298	1
MAPKAP1	296	1
hsa-mir-550a-3	295	1
hsa-mir-4687	295	1
BTBD18	295	1
BRD9	295	1
NUDCD2	294	1
HK2	292	1
LGR4	290	1
EMD	289	1
TOMM70A	286	1
TAF1C	282	1
MYLK2	282	1
hsa-mir-550b-2	281	1
BTBD10	281	1
USP27X	281	1
SLC12A7	279	1
NKAPL	278	1
PRLH	276	1
NTAN1	272	1
FDX1L	269	1
PSMG3	269	1
NDUFB10	268	1
MCFD2	268	1
GPR101	268	1
PRRX1	268	1
CPLX4	267	1
RIMKLB	262	1
TCP10L	261	1
B3GALT4	260	1
ATXN7L3	259	1
NGDN	256	1
CYB561A3	253	1
SLC15A3	248	1
SPOP	247	1
EMC2	247	1
MFSD12	246	1
CPNE2	246	1
ISG20L2	243	1
CRISPLD1	239	1
CEP85	238	1
POLK	238	1
CXorf40B	237	1
hsa-mir-520f	235	1
SEC24A	234	1
hsa-mir-193b	233	1
GATA6	233	1
FAM110D	233	1
DPM2	233	1
CHD4	232	1
PTPN7	231	1
CDR1	231	1
ZBTB39	228	1
ZNF217	228	1
OIP5	224	1
CDC42BPB	223	1
PRM1	222	1
NPDC1	222	1
FREM2	221	1
SLC25A39	219	1
LOC389895	218	1
COMMD2	217	1
LIN37	217	1
DUSP22	215	1
TULP3	210	1
MATN1	209	1
ESR2	209	1
HS3ST4	207	1
hsa-mir-1288	206	1
EHD3	206	1
ZNF577	206	1
OR2T27	203	1
NCOA5	202	1
SLC24A1	201	1
PRKCE	201	1
GSTT1	201	1
ZNF808	201	1
PLAC8	201	1
ASIC1	200	1
hsa-mir-3183	199	1
SEMA3A	199	1
HDAC6	199	1
RNF114	199	1
APOC2	198	1
FBXO45	195	1
FAM111B	195	1
LCOR	194	1
ZIK1	193	1
TDRD5	193	1
TIPIN	193	1
CYR61	191	1
ZNF620	189	1
hsa-mir-6499	186	1
EVC	185	1
hsa-mir-26a-1	184	1
HELLS	183	1
IYD	180	1
HIST1H2BL	179	1
IKZF5	179	1
OR1L3	178	1
DUSP8	178	1
PLLP	176	1
UBE2C	176	1
DSC2	174	1
SLCO3A1	173	1
SETD8	172	1
ADM	172	1
LRRK1	172	1
AKT1	171	1
ZNF429	169	1
CARM1	166	1
GLT8D2	166	1
TMEM41A	165	1
RNASEH1	165	1
RPL11	164	1
LYPD2	162	1
FFAR1	162	1
TBC1D22B	162	1
USP6NL	160	1
DCAF15	157	1
PSMC2	156	1
NPR3	154	1
LPPR3	152	1
YJEFN3	152	1
TMEM151A	151	1
MAP7D2	150	1
MLXIP	148	1
GSTT2B	146	1
PRAMEF5	144	1
CLCNKB	144	1
OR4A15	143	1
MAGEC3	143	1
PIK3AP1	142	1
THEG	142	1
HIF1A	141	1
IPO9	141	1
GRM4	140	1
SPATA31E1	140	1
KAZALD1	139	1
ZBTB47	139	1
EDDM3B	138	1
GTF3C5	138	1
BLNK	137	1
CC2D1B	135	1
hsa-mir-183	134	1
ACVR1	134	1
COL24A1	134	1
NonTargetingControlGuideForHuman_0048	133	1
hsa-mir-6865	132	1
GPR176	132	1
STK16	130	1
GAGE12I	129	1
ALX1	128	1
OR51E2	127	1
ZNF681	127	1
NVL	127	1
IFRD2	126	1
hsa-mir-7106	125	1
OR13C2	125	1
HDGF	124	1
STAR	124	1
RBMX2	123	1
MAD2L2	121	1
ZNF408	120	1
TDRKH	120	1
ABCA6	119	1
LRRFIP2	119	1
BMPR2	119	1
hsa-mir-3177	118	1
GALNT1	117	1
GTF2H2	116	1
SMR3B	116	1
TTC3	115	1
OR7C1	115	1
FAM227A	113	1
TMEM232	113	1
SPANXC	112	1
KIAA0368	112	1
TFPT	112	1
AIMP1	111	1
LSMD1	110	1
TLK1	109	1
C20orf26	108	1
POMP	107	1
PKD1L3	107	1
ZNF263	107	1
C16orf87	106	1
ARHGAP18	106	1
ZFPM2	105	1
SIRPA	105	1
hsa-mir-1271	104	1
HYAL1	104	1
TMEM222	103	1
HIC1	102	1
OR2W3	102	1
NRXN2	101	1
DEFB112	101	1
MTOR	101	1
MAP6D1	100	1
EPB41L4A	98	1
C16orf3	97	1
CD5	97	1
NonTargetingControlGuideForHuman_0509	96	1
MTMR14	96	1
CCL20	96	1
CNTNAP1	96	1
GCAT	96	1
MRPL39	96	1
PTPN9	95	1
KCNK15	95	1
OR6C70	94	1
hsa-mir-4311	93	1
SLC38A10	93	1
PROKR1	93	1
CDCA3	92	1
SDHC	92	1
IGFL1	92	1
GAREM	91	1
EXOSC1	90	1
FAM221B	90	1
DDX60L	90	1
NUP62CL	90	1
NonTargetingControlGuideForHuman_0651	89	1
hsa-mir-4419b	89	1
NDUFS3	89	1
TMEM5	89	1
PAPD5	89	1
ACBD7	87	1
MORF4L1	85	1
FGD5	84	1
HTR1E	84	1
hsa-mir-31	83	1
FPGS	83	1
TUBA1A	83	1
FAAH	82	1
CASP6	82	1
OR4S1	82	1
OR7E24	81	1
USP26	81	1
PTPRU	80	1
MINA	80	1
ZNF213	79	1
CCDC80	79	1
CA2	79	1
ZBTB7A	79	1
hsa-mir-3117	78	1
FIP1L1	78	1
CCDC151	78	1
GEMIN2	78	1
KCNA6	78	1
ATOX1	78	1
hsa-mir-764	77	1
NAT16	77	1
ATP5J2-PTCD1	76	1
GTF3C3	76	1
ZNF654	76	1
CDK5RAP1	76	1
FAM101A	76	1
BSPRY	75	1
PCDHGA11	73	1
OOEP	73	1
B4GALNT2	73	1
DTHD1	73	1
POM121	71	1
ARSI	71	1
ARRDC3	70	1
CCL2	70	1
ZNF394	69	1
MYH6	68	1
GABRP	68	1
ASTL	68	1
CTPS1	68	1
WFDC2	68	1
IL20RA	67	1
SEMA6B	67	1
RBP4	66	1
NonTargetingControlGuideForHuman_0637	65	1
RHBDL3	65	1
OR1N1	65	1
GGA3	65	1
AGAP8	64	1
ATG7	63	1
TBCE	63	1
SPRED1	63	1
GSDMB	62	1
PRR23C	62	1
ZC3HC1	62	1
CD200R1	61	1
SLC52A1	61	1
LDHA	61	1
ZC3H7B	61	1
NonTargetingControlGuideForHuman_0544	60	1
NonTargetingControlGuideForHuman_0630	60	1
ARMCX5	60	1
SLC25A24	60	1
APBA3	60	1
SH3BP2	60	1
PRR20A	59	1
HMGCLL1	59	1
ZNF598	58	1
ACTRT3	58	1
AGPAT3	58	1
hsa-mir-205	57	1
TBCK	57	1
GMEB2	57	1
C17orf70	57	1
GGN	57	1
FUT10	57	1
NonTargetingControlGuideForHuman_0723	56	1
XAGE1E	56	1
hsa-mir-4725	56	1
ZNF507	56	1
RGS7	56	1
RASSF6	56	1
KRTAP10-8	55	1
CSTB	55	1
DENND2A	55	1
ASB2	55	1
CABIN1	55	1
ACYP1	54	1
SLC51B	54	1
SC5D	54	1
ORMDL3	54	1
SERPINB12	54	1
BLK	54	1
PPP1R18	54	1
B3GALT6	54	1
MAN1A1	53	1
HMGN1	53	1
GPRASP2	52	1
ABCA10	52	1
RHAG	52	1
OR5R1	52	1
hsa-mir-6165	51	1
EPX	50	1
CDC5L	50	1
NT5C	50	1
PIGT	50	1
AFAP1	50	1
ST8SIA2	50	1
XRN2	50	1
GOSR1	49	1
RIMBP3	49	1
BRD3	49	1
ICAM1	49	1
RHOH	49	1
HOXA5	49	1
EPM2AIP1	49	1
LOC154872	49	1
ABHD1	49	1
OR4C46	48	1
SEC16B	48	1
NonTargetingControlGuideForHuman_0606	47	1
EXOC6	47	1
RYBP	47	1
LTA4H	47	1
TRIM6	47	1
OR51B2	46	1
MMP24	46	1
RTDR1	46	1
SIAH3	46	1
PPP1R13B	45	1
SCN5A	45	1
FSTL1	45	1
KRTAP10-7	45	1
SCN2B	45	1
TEF	45	1
SWAP70	45	1
MUC2	45	1
hsa-mir-3944	44	1
LGSN	44	1
GPR119	44	1
TMIGD2	44	1
AIP	44	1
NASP	44	1
NOP10	44	1
DCAF8L1	44	1
APLNR	44	1
OGFOD2	43	1
C4orf51	43	1
SENP2	43	1
SLC23A1	43	1
PKP1	42	1
PRR18	42	1
CSGALNACT1	42	1
NBPF3	42	1
PRSS55	42	1
NonTargetingControlGuideForHuman_0543	41	1
DHRS13	41	1
RPL37	41	1
NonTargetingControlGuideForHuman_0823	40	1
AKNAD1	40	1
EDN3	40	1
RAC1	40	1
NHLRC4	40	1
LGI3	40	1
ZNF583	39	1
PRC1	39	1
PARP9	39	1
PTPRS	39	1
WDR7	39	1
IRX6	38	1
ZNF354C	38	1
ZNF175	37	1
KIAA0226L	37	1
hsa-mir-449c	36	1
SLC30A2	36	1
TAF6	36	1
FGF4	36	1
KCNJ10	36	1
IFITM2	35	1
CFHR2	35	1
AKAP8L	35	1
CYCS	35	1
NonTargetingControlGuideForHuman_0070	34	1
CCBP2	34	1
PRAMEF18	34	1
TNFSF11	34	1
ZNF563	34	1
TIGD4	34	1
NonTargetingControlGuideForHuman_0871	33	1
NLRP11	33	1
LPL	33	1
ANPEP	33	1
FAM188B	33	1
HCST	33	1
OR10T2	33	1
RFT1	33	1
NonTargetingControlGuideForHuman_0750	32	1
BEND3	32	1
RAG2	32	1
SATL1	32	1
FTCD	32	1
LMO3	32	1
hsa-mir-3118-1	31	1
hsa-mir-4775	31	1
IQCJ	31	1
CTAGE15	31	1
IVD	31	1
ZNF713	31	1
MED12L	31	1
GMFB	30	1
ABCB5	30	1
UPF3B	30	1
IL3	30	1
ENTPD8	30	1
OR4K1	29	1
NPHP1	29	1
HIRA	29	1
hsa-mir-6735	28	1
WDR48	28	1
BAI2	28	1
AQP4	28	1
2019-09-10	28	1
hsa-mir-196b	27	1
AMICA1	27	1
CCNI	27	1
LDOC1	27	1
OTX2	27	1
TAS2R16	27	1
NAIF1	27	1
BTBD17	27	1
BMP8B	26	1
OR11H12	26	1
C6orf47	26	1
GABRB2	26	1
NOS1AP	26	1
FAM26F	26	1
SEL1L	26	1
PRSS37	26	1
ZBED6	26	1
NACC1	26	1
HBA1	25	1
CILP	25	1
WDR96	25	1
ZNF672	25	1
CRTC3	25	1
SH3D21	25	1
C2CD3	25	1
CAV3	25	1
TMEM251	25	1
hsa-mir-4456	24	1
hsa-mir-455	24	1
hsa-mir-8083	24	1
OR10Z1	24	1
NCCRP1	24	1
KRTAP15-1	24	1
HSPH1	24	1
TUBA3C	24	1
REN	24	1
TLX1	24	1
KLF12	24	1
BHLHE22	24	1
GORAB	24	1
NonTargetingControlGuideForHuman_0106	23	1
FRG2C	23	1
TUBB3	23	1
ZHX2	23	1
RNASE11	23	1
CAMK2B	23	1
CDH15	23	1
MSANTD3-TMEFF1	22	1
SYNDIG1	22	1
BACE1	22	1
TRIML1	22	1
ARCN1	22	1
OR5M8	22	1
OR4D1	22	1
PGK1	22	1
hsa-mir-3130-2	21	1
hsa-mir-6809	21	1
TCEAL4	21	1
FGF13	21	1
KDM2B	21	1
NUDC	21	1
CLCN2	21	1
NAV3	21	1
KRTAP2-4	20	1
ERBB3	20	1
FGF10	20	1
STARD13	20	1
TCTE3	20	1
CKS1B	20	1
CDK18	20	1
CD7	20	1
OR2L8	20	1
L2HGDH	20	1
PVRL3	20	1
CHRM1	20	1
MAGEA2	19	1
hsa-mir-6076	19	1
F8A3	19	1
VSNL1	19	1
SOLH	19	1
NMBR	19	1
OR10X1	19	1
PRSS3	19	1
OR1J4	19	1
CCNJ	19	1
hsa-mir-3119-1	18	1
PXK	18	1
PPP1CC	18	1
PRKCZ	18	1
CASK	18	1
WDR82	18	1
TPST1	18	1
METTL16	18	1
CXorf51A	17	1
MTBP	17	1
CLDN5	17	1
GPR4	17	1
MYT1L	17	1
GEMIN7	17	1
TRPM8	17	1
LGALS4	17	1
TPTE	17	1
CFL2	17	1
COX6B2	17	1
ATP6V1E2	17	1
ZFP82	17	1
hsa-mir-6878	16	1
KBTBD3	16	1
HIST1H4A	16	1
TNMD	16	1
LEP	16	1
EMX1	16	1
OR5B12	16	1
DNLZ	16	1
MPG	16	1
ARHGAP12	16	1
UQCC	15	1
PTCD1	15	1
PPM1F	15	1
L1TD1	15	1
OSBPL6	15	1
LOC200726	15	1
CNOT1	15	1
ENDOG	15	1
MTSS1	15	1
GSAP	15	1
hsa-mir-6807	14	1
hsa-mir-3189	14	1
hsa-mir-3941	14	1
hsa-mir-6832	14	1
hsa-mir-6081	14	1
GPR75	14	1
TMEM52B	14	1
GNG4	14	1
HIST1H4D	14	1
CARD8	14	1
C2CD5	14	1
C6orf15	14	1
SLFNL1	14	1
hsa-mir-3165	13	1
RBM4	13	1
UGT2B15	13	1
PTK2	13	1
SLC7A3	13	1
ADAMTS16	13	1
TM4SF18	13	1
OR5AC2	13	1
TRO	13	1
TOLLIP	13	1
OR10AD1	13	1
COPB2	13	1
MKL1	13	1
WDR19	13	1
RPS23	13	1
ARPC3	12	1
FAHD2B	12	1
VPS37B	12	1
OR6C65	12	1
KCNJ2	12	1
CIB4	12	1
TMEM176A	12	1
FAM186A	12	1
PSG5	12	1
ZSCAN2	12	1
MOSPD2	12	1
RSPH1	12	1
PHLDB3	12	1
CALHM3	12	1
PAPPA	12	1
OTOA	12	1
MAFB	12	1
DEFB125	12	1
TMEM236	12	1
ZDHHC13	12	1
CHSY3	11	1
VPS51	11	1
VPS53	11	1
LRRC30	11	1
SNN	11	1
GLT1D1	11	1
FAM175B	11	1
C20orf195	11	1
CRYBB1	11	1
PLSCR5	11	1
SRPK1	11	1
MGA	11	1
ZNF721	11	1
NonTargetingControlGuideForHuman_0303	10	1
hsa-mir-4281	10	1
HDAC3	10	1
ENO3	10	1
CAPNS1	10	1
ZNF148	10	1
PABPC1L	10	1
PRR5-ARHGAP8	10	1
KLHL2	10	1
BDP1	10	1
MCM9	10	1
SMIM14	10	1
WDR3	10	1
THBS4	10	1
DPY19L4	10	1
ZDHHC9	10	1
IL10	10	1
EAF1	10	1
NonTargetingControlGuideForHuman_0256	9	1
NonTargetingControlGuideForHuman_0647	9	1
CT47A5	9	1
PCDHGB6	9	1
CT45A5	9	1
DPH3P1	9	1
SPHKAP	9	1
XRCC6BP1	9	1
PDE8B	9	1
AMOTL2	9	1
AIF1L	9	1
MST1R	9	1
TMC6	9	1
LAPTM4A	9	1
LY96	9	1
OR5D16	9	1
SLC35B4	9	1
SEC14L4	9	1
ZNF671	9	1
PON3	9	1
RERGL	9	1
SYT9	9	1
YTHDF3	9	1
GTPBP2	9	1
C2CD4C	9	1
OR6N1	9	1
FTSJD2	8	1
PSAT1	8	1
DCSTAMP	8	1
MAL	8	1
TMEM196	8	1
DIAPH3	8	1
SLC25A20	8	1
GGT6	8	1
NR6A1	8	1
MAPK4	8	1
NOTCH2	8	1
ZRANB1	8	1
[truncated: 1,206 more rows]

## Sheet: Replicate 2
Gene	Total sgRNAs	Unique
ZNRF3	6692	6
CSNK1A1	1258	4
IL17RD	682	4
USP7	18	4
UQCC2	6	4
SLC27A4	6	4
SLC26A5	3377	3
MTRR	2342	3
APC	1777	3
ZAK	1048	3
NHLRC1	942	3
ZNF585A	418	3
STPG2	274	3
C2CD5	212	3
TMEM79	196	3
CYP1A1	187	3
hsa-mir-8061	141	3
SPAG9	139	3
TRAF7	60	3
ATXN3	56	3
ATP13A3	54	3
MX2	50	3
SNX9	40	3
OR10G9	39	3
ZNF680	38	3
BLID	36	3
EED	29	3
LDLRAD1	28	3
MROH8	24	3
IL7	24	3
TMEM52B	21	3
IFT122	21	3
ANXA10	20	3
ARRDC4	18	3
OR14C36	17	3
C19orf18	15	3
AQP3	13	3
SCAMP1	12	3
HAAO	10	3
SLC5A12	10	3
UBE4B	10	3
MFSD8	9	3
LRIT1	8	3
EIF3H	8	3
GPC2	8	3
SLITRK1	8	3
C15orf48	6	3
CTSB	6	3
SLC22A23	6	3
hsa-mir-4802	5	3
LAIR1	5	3
CCDC169	5	3
EBF4	5	3
INPP5J	4	3
UNC79	4	3
FAM175B	4	3
FAS	4	3
COL3A1	4	3
IFI44L	4	3
INTS6	4	3
PRPH	3	3
HNRNPR	3	3
COPS7A	3	3
NASP	3	3
DEFB118	3	3
CCDC110	3	3
ZNF287	3	3
DAGLA	3	3
DLEC1	3	3
CDH6	3	3
SQLE	3	3
PILRA	3	3
EPT1	3	3
PRPH2	3	3
CSNK1G2	261773	2
ISG20L2	152244	2
hsa-mir-4687	81038	2
DEFB112	66268	2
OR7C1	29190	2
OR7E24	27587	2
OR14I1	15487	2
MMP8	12341	2
PRKCZ	11072	2
OR1J4	10436	2
NME5	8754	2
FAM127A	8629	2
XRCC6BP1	8164	2
ZNF671	6449	2
GLT1D1	5626	2
LOC100129636	4029	2
BMP2	3571	2
SULF2	2994	2
WDR52	2942	2
PTGDR2	2701	2
RASEF	2589	2
NPR3	2492	2
ANHX	2334	2
FAM186A	2157	2
DEFB132	2052	2
RRP8	1720	2
hsa-mir-942	1681	2
ANO4	1614	2
RAD54L2	1560	2
KLRC2	1519	2
TP53	1466	2
TLL1	1382	2
KPNA2	1310	2
SNX25	1288	2
LCE4A	1236	2
CNN2	1180	2
CT45A6	1028	2
ZFYVE28	962	2
hsa-mir-7702	830	2
ZNF385A	801	2
LAPTM4A	790	2
NLRP3	787	2
PIGA	651	2
RNF219	647	2
CXCL2	629	2
MYO10	565	2
RNF217	500	2
CMTM5	481	2
GSTT2B	425	2
SGPL1	421	2
CC2D2B	417	2
GPR156	391	2
ANXA2	390	2
WRAP73	365	2
FKBP6	347	2
FOXK1	322	2
ANKRD40	300	2
hsa-mir-4713	291	2
C1orf94	272	2
CADM1	264	2
LDHAL6B	260	2
RNASE7	256	2
CHRNB1	232	2
KATNBL1	229	2
WRB	207	2
CYP46A1	205	2
CHGB	188	2
MS4A8	188	2
SDHA	185	2
DDX19B	173	2
AMER1	171	2
NR4A3	166	2
EPHA2	156	2
LHFPL5	155	2
CALM1	154	2
GPR63	148	2
PDCD5	139	2
UBE2L3	130	2
C20orf141	128	2
RPLP2	122	2
TIGIT	122	2
GTF3A	118	2
ADAM8	113	2
TPP2	112	2
SAP25	109	2
hsa-mir-3177	104	2
SEMA5A	100	2
SEC16B	98	2
RSU1	97	2
CHSY3	96	2
RFPL3	95	2
SSR3	94	2
RHOBTB1	88	2
TRIM17	84	2
UCHL3	81	2
FOXI1	80	2
USMG5	78	2
TCEAL4	75	2
STYXL1	72	2
EPS8L1	68	2
KRT8	66	2
ACAP2	64	2
NOD1	64	2
L3MBTL2	63	2
RSPH1	63	2
TM7SF3	63	2
ETNPPL	63	2
NOTCH1	62	2
hsa-mir-1262	61	2
hsa-mir-105-1	60	2
BID	59	2
MVP	58	2
ALG5	57	2
TRO	56	2
PNP	55	2
MRPS35	53	2
CASP12	53	2
PPM1F	52	2
WNT8B	52	2
ZBTB44	52	2
TMEM198	50	2
hsa-mir-6773	49	2
MECOM	49	2
FAM198A	48	2
MAPK8	48	2
C20orf26	47	2
MPST	47	2
SCN10A	45	2
PGAP2	45	2
HIRA	43	2
CYCS	43	2
HP	43	2
TMEM202	42	2
IL6R	41	2
TAS2R42	39	2
HEPN1	39	2
ZNF239	38	2
SCN3A	38	2
SLC25A27	37	2
C19orf24	37	2
HIVEP2	37	2
SMARCAL1	36	2
ZRANB1	36	2
hsa-mir-6513	35	2
ATP7B	35	2
CSNK1E	35	2
PGA3	34	2
ZNF25	34	2
ALKBH3	34	2
CSK	33	2
L3HYPDH	32	2
PMEPA1	32	2
CPNE5	32	2
OR51M1	31	2
PDE8B	31	2
TTC17	30	2
CGN	30	2
XG	29	2
IWS1	29	2
BOD1L1	28	2
CATSPER3	28	2
FAM83H	27	2
SGCB	27	2
USP22	27	2
EDIL3	26	2
OR13H1	26	2
FAM102B	26	2
CYR61	25	2
ICMT	25	2
TCN2	25	2
MDK	24	2
GTPBP2	24	2
SLC35A3	24	2
MAMSTR	24	2
IL13RA2	23	2
SEPHS1	23	2
CLEC12A	23	2
VAMP1	22	2
SMIM12	22	2
KRTAP27-1	21	2
KRBA2	21	2
ZFP92	20	2
DLGAP1	20	2
ROR1	20	2
SLC25A10	19	2
CABLES1	19	2
TAX1BP3	19	2
PAK4	19	2
CCDC142	19	2
SLC37A3	19	2
SPANXD	18	2
hsa-mir-298	18	2
FAM199X	18	2
TAS2R20	18	2
RPS6	18	2
HS1BP3	18	2
LEMD2	17	2
FGF20	17	2
ZNF217	17	2
PDHA2	17	2
RBM23	17	2
PAGR1	17	2
CREB5	17	2
PRMT2	16	2
KCNMB4	16	2
SLC16A8	16	2
ABCB6	16	2
C10orf107	16	2
VARS	16	2
C6orf62	16	2
CREBZF	16	2
DARS	16	2
MED31	16	2
TSPAN12	16	2
OR4F6	16	2
ADAD1	15	2
ARPP21	15	2
ZNF730	15	2
GRIA1	15	2
ARSB	15	2
TRAF3IP1	15	2
AK7	15	2
MSTN	14	2
OR5D16	14	2
KIAA1644	14	2
ANKRD10	14	2
FAM46A	14	2
ADPRHL2	14	2
SOCS7	14	2
C1orf146	14	2
ZNF622	14	2
GAS2	14	2
FAM25C	13	2
SERINC1	13	2
SCN1B	13	2
CPT1B	13	2
NPL	13	2
CAPZA1	13	2
KRTAP24-1	13	2
ADCY1	13	2
SPTLC2	13	2
LMTK3	13	2
FOPNL	13	2
FN3KRP	13	2
IFNA6	13	2
DMRTC1	12	2
FAIM	12	2
SCAND3	12	2
RPS3	12	2
APMAP	12	2
TJAP1	12	2
ITGB1	12	2
LAMA4	12	2
GRM6	12	2
LOH12CR1	12	2
B3GALT5	12	2
SRGAP3	12	2
TEAD2	12	2
OR2B11	12	2
MLC1	12	2
BNIP2	12	2
SPATA13	11	2
NEIL1	11	2
TAF8	11	2
ADH6	11	2
RPL28	11	2
FOSL2	11	2
S1PR5	11	2
E2F4	11	2
PHF15	11	2
NDUFV3	11	2
TMEM236	11	2
RTBDN	11	2
CRP	11	2
CNNM3	11	2
ANKRD36	10	2
CXCL9	10	2
PITPNC1	10	2
MGAM	10	2
DTX3	10	2
PLSCR5	10	2
LCE2B	10	2
SHROOM2	10	2
FAM65A	10	2
CTH	10	2
GAS2L3	10	2
POC5	10	2
TTC19	10	2
CYB5R4	10	2
EI24	10	2
FRMPD1	10	2
FAM177A1	10	2
RANBP2	9	2
XKRY	9	2
TNFRSF12A	9	2
JARID2	9	2
SLC9A8	9	2
KIF22	9	2
AKAP3	9	2
RABEP2	9	2
SYNPO2	9	2
C17orf78	9	2
HMCN1	9	2
OR2A7	9	2
FXYD4	9	2
FA2H	9	2
MBD1	9	2
hsa-mir-5089	8	2
TRAP1	8	2
DNAJB9	8	2
DCN	8	2
TAS2R19	8	2
BATF3	8	2
IFNB1	8	2
MOK	8	2
MCM2	8	2
CRYBA2	8	2
BTRC	8	2
CRIM1	8	2
ANKFY1	8	2
GABRA5	8	2
DDO	8	2
STC2	8	2
PSG11	8	2
GJA10	8	2
FAM153A	8	2
SMTNL2	8	2
hsa-mir-5196	7	2
hsa-mir-7106	7	2
SP100	7	2
UBR3	7	2
GABARAPL2	7	2
HIST1H3H	7	2
SF3B2	7	2
C7orf71	7	2
RDH11	7	2
OR10K2	7	2
THNSL2	7	2
GATAD2A	7	2
ROBO4	7	2
JDP2	7	2
FER1L6	7	2
ZNF84	7	2
HMGCL	7	2
BTBD8	7	2
GLMN	7	2
LGALS9B	7	2
FAM46C	7	2
hsa-mir-3714	6	2
hsa-mir-5008	6	2
hsa-mir-548e	6	2
KLRK1	6	2
FLYWCH2	6	2
PRCC	6	2
SGIP1	6	2
C9orf41	6	2
ENOSF1	6	2
TCEAL2	6	2
SYNPO	6	2
SUDS3	6	2
CNPY3	6	2
PSMD5	6	2
EFNB1	6	2
C2orf15	6	2
BCMO1	6	2
SDCBP	6	2
DNAJC13	6	2
DEFB126	6	2
MST1R	6	2
SNX24	6	2
MND1	6	2
TMEM246	6	2
PLXDC1	6	2
CTU2	6	2
RNF113A	6	2
RSPO1	6	2
NPY4R	6	2
C12orf57	6	2
CD274	6	2
TNFAIP8	6	2
ADAT1	6	2
TXNDC16	6	2
BTBD18	6	2
IKBKG	6	2
CHTF8	6	2
PQLC2	6	2
DDC	6	2
TMEM189	5	2
hsa-mir-1260b	5	2
hsa-mir-628	5	2
hsa-mir-3910-2	5	2
TBC1D32	5	2
hsa-mir-196a-2	5	2
hsa-mir-7973-1	5	2
hsa-mir-3064	5	2
MDH1	5	2
TGIF2-C20orf24	5	2
ITGA9	5	2
MYO19	5	2
OR10H2	5	2
TMEM190	5	2
MPDZ	5	2
OR2T27	5	2
RIN2	5	2
EXOSC1	5	2
EYA1	5	2
CAMK1G	5	2
SIN3B	5	2
POLR3C	5	2
DUSP4	5	2
MAGEA8	5	2
RPTOR	5	2
KCNG4	5	2
PRR9	5	2
KCTD20	5	2
BEAN1	5	2
TMPRSS13	5	2
ZBTB5	5	2
KIF18B	5	2
KATNA1	5	2
APOBEC3C	5	2
GPR108	5	2
FKBP11	5	2
XPC	5	2
ZNF365	5	2
CNTN3	5	2
LRRIQ1	5	2
SPANXN3	5	2
BRAT1	5	2
ARHGAP22	5	2
PRSS35	5	2
PIWIL3	5	2
TDRKH	5	2
SPIN2A	4	2
hsa-mir-6895	4	2
CCDC9	4	2
SPOP	4	2
TMEM220	4	2
CNP	4	2
XPR1	4	2
SLC6A5	4	2
ABCC10	4	2
LILRB1	4	2
B3GAT2	4	2
SCAF1	4	2
ITGAE	4	2
GTF2A1L	4	2
TYK2	4	2
ACTN2	4	2
OR1L3	4	2
NKAIN3	4	2
KHDC3L	4	2
C19orf73	4	2
SNAI1	4	2
ZNF654	4	2
PHF7	4	2
ARX	4	2
DENND4A	4	2
DIAPH1	4	2
ACBD5	4	2
TAS2R3	4	2
MEIS1	4	2
AHSA1	4	2
TBC1D9	4	2
TMEM184B	4	2
SIPA1L2	4	2
HIF1AN	4	2
TMEM61	4	2
MACC1	4	2
TUBA3D	4	2
HLA-DQA1	4	2
GARNL3	4	2
CLRN2	4	2
RHO	4	2
NELL2	4	2
PCDH15	4	2
GTF2F1	4	2
HSP90AA1	4	2
EXOC7	4	2
DUSP6	4	2
SELRC1	4	2
GSTT1	4	2
UGT1A9	3	2
SSX4	3	2
hsa-mir-5047	3	2
hsa-mir-1181	3	2
SAA4	3	2
hsa-mir-5682	3	2
GYPB	3	2
MEF2B	3	2
GLRA4	3	2
LHCGR	3	2
SMAD4	3	2
STMND1	3	2
NADSYN1	3	2
LMCD1	3	2
EXD2	3	2
PCDH11X	3	2
HVCN1	3	2
ZNF10	3	2
SFI1	3	2
NDUFA8	3	2
KIAA1210	3	2
LOC100287036	3	2
EN2	3	2
CCL28	3	2
HINT2	3	2
RBBP9	3	2
SNX21	3	2
PRM3	3	2
PUS3	3	2
FCN3	3	2
HBD	3	2
HAO2	3	2
GJA3	3	2
USP31	3	2
OPN5	3	2
SLC25A20	3	2
CRY2	3	2
TMX4	3	2
ELOVL7	3	2
BRD1	3	2
DISP1	3	2
CLN6	3	2
EIF5AL1	3	2
TRAPPC11	3	2
FGFBP2	3	2
CASZ1	3	2
ZNF879	3	2
EFCAB13	3	2
NFKB2	3	2
LDHC	3	2
TP53BP2	3	2
TANGO2	3	2
AURKC	3	2
GCK	3	2
BRICD5	3	2
PCGF6	3	2
RABL6	3	2
VWA3B	3	2
NBL1	3	2
LRRC36	3	2
YBX2	3	2
SPEF2	3	2
KLK5	3	2
GIGYF1	3	2
CNTN6	3	2
PPHLN1	3	2
GPRIN3	3	2
C7orf29	3	2
C18orf8	3	2
PNPLA6	3	2
IGFBP4	3	2
EFCAB1	3	2
ACSL1	3	2
KLC3	3	2
NXF5	3	2
UST	3	2
FAHD1	3	2
NCKAP5	3	2
TMEM98	3	2
NME8	3	2
TLR6	3	2
PIK3CG	3	2
IL18RAP	3	2
ARMCX3	3	2
NFIC	3	2
ACKR4	3	2
DCST2	3	2
ADD3	3	2
SZT2	3	2
ZNF517	3	2
OR6T1	3	2
INTU	3	2
KREMEN1	3	2
POU2AF1	3	2
BTLA	3	2
ZSCAN32	3	2
FABP6	3	2
ANTXR2	3	2
ALAS2	3	2
METAP2	3	2
KLHL11	3	2
CCDC12	3	2
CHRM2	3	2
GPR55	3	2
CERS3	3	2
EPHA1	3	2
HIF1A	3	2
APOA4	3	2
NIPA2	3	2
DEFB128	3	2
CD99_X	3	2
SMPD3	3	2
CHP1	3	2
ZBTB9	3	2
CHCHD3	3	2
RGP1	3	2
ZNF391	3	2
ANKRD13B	3	2
hsa-mir-941-4	2	2
DAZ2	2	2
SPANXA2	2	2
hsa-mir-556	2	2
hsa-mir-2276	2	2
hsa-mir-514b	2	2
hsa-mir-300	2	2
hsa-mir-744	2	2
hsa-mir-548y	2	2
hsa-mir-29b-2	2	2
hsa-mir-3179-3	2	2
MBD3L3	2	2
SPRR2F	2	2
hsa-mir-4463	2	2
hsa-mir-6780b	2	2
hsa-mir-6740	2	2
MTRNR2L5	2	2
hsa-mir-338	2	2
hsa-mir-4778	2	2
hsa-mir-378e	2	2
hsa-mir-876	2	2
CXorf49	2	2
FOXD4L4	2	2
CISD2	2	2
PRAMEF5	2	2
KRTAP6-1	2	2
MEX3A	2	2
EFCAB3	2	2
FAM118A	2	2
TRAPPC9	2	2
ANK3	2	2
NDUFAF4	2	2
RAX	2	2
ATXN7L2	2	2
MOSPD1	2	2
TADA3	2	2
TFCP2	2	2
ZNF576	2	2
RHBDF1	2	2
MTM1	2	2
ROPN1	2	2
PHF14	2	2
COPRS	2	2
ZIK1	2	2
KRTAP1-1	2	2
NRN1L	2	2
NPTXR	2	2
KLHL13	2	2
AXDND1	2	2
OR2G3	2	2
FAM172A	2	2
NRIP1	2	2
FAM53B	2	2
GDA	2	2
C16orf87	2	2
PAAF1	2	2
ADCY3	2	2
CKMT1B	2	2
BMX	2	2
TET2	2	2
C5orf64	2	2
TMEM37	2	2
CHCHD6	2	2
SCRN2	2	2
MANBAL	2	2
MYH2	2	2
IARS2	2	2
HOXD8	2	2
PLEKHA8	2	2
ZFP37	2	2
B4GALT3	2	2
ZNF264	2	2
NAALADL1	2	2
AZGP1	2	2
PSPN	2	2
ST3GAL1	2	2
PLG	2	2
SERPINF1	2	2
SSTR4	2	2
SCGB2B2	2	2
CAPS	2	2
CASC3	2	2
FGF22	2	2
POLD3	2	2
P2RX4	2	2
ASPHD1	2	2
CTXN1	2	2
VSIG1	2	2
TAF15	2	2
PLEKHG7	2	2
HMOX1	2	2
2020-03-04	2	2
SCRG1	2	2
C6orf165	2	2
IL20RB	2	2
AKT1	2	2
MRPL22	2	2
PXDC1	2	2
MTMR4	2	2
RPS27	2	2
METTL20	2	2
TLDC2	2	2
HAT1	2	2
MCFD2	2	2
TEFM	2	2
ARMC8	2	2
CCDC175	2	2
EEF1G	2	2
ASCL3	2	2
HSD17B6	2	2
PLEKHJ1	2	2
C3orf67	2	2
NOP9	2	2
SOBP	2	2
THUMPD3	2	2
NXT2	2	2
XPA	2	2
SERPINB6	2	2
SLC6A2	2	2
ATN1	2	2
MANF	2	2
MEMO1	2	2
LOC643802	2	2
ZNF132	2	2
ZNF540	2	2
PATL2	2	2
FAM151A	2	2
SAAL1	2	2
FAH	2	2
OR51Q1	2	2
CAT	2	2
DNAJC17	2	2
DHRS1	2	2
IFT140	2	2
STK10	2	2
MLLT4	2	2
GPR39	2	2
NADKD1	2	2
TGM5	2	2
KLHL22	2	2
VWA5B2	2	2
KIAA2013	2	2
AK3	2	2
STK19	2	2
ADCY2	2	2
NEUROD4	2	2
KNCN	2	2
TIMP1	2	2
CNDP2	2	2
SLC35C2	2	2
DPYS	2	2
NBPF8	2	2
POLR2A	2	2
DNAJC22	2	2
BCL2L1	2	2
NPAS3	2	2
HESX1	2	2
ARAP1	2	2
WDFY4	2	2
GNB2	2	2
RAPH1	2	2
CYP11A1	2	2
PNMT	2	2
MCM8	2	2
PKDREJ	2	2
BSG	2	2
LOC81691	2	2
CD33	2	2
POU2F2	2	2
LGR4	2	2
TBX4	2	2
KHK	2	2
ADAMTSL5	2	2
SYS1	2	2
ITGB6	2	2
SCN2B	2	2
SECISBP2L	2	2
OR2H1	2	2
CUX1	2	2
CCNF	2	2
COA3	2	2
PCSK1N	2	2
COMMD8	2	2
CD68	2	2
GNL3L	2	2
QKI	2	2
SEZ6	2	2
APOBR	2	2
ZBTB40	2	2
ZSWIM3	2	2
FMO1	2	2
C19orf40	2	2
C1orf192	2	2
PGBD3	2	2
FCRL2	2	2
IL13RA1	2	2
ENAH	2	2
RAB23	2	2
MFSD4	2	2
GLP2R	2	2
ARL8A	2	2
WDR17	2	2
NACC1	2	2
CLINT1	2	2
ACTR8	2	2
LETM1	2	2
KLF16	2	2
RDH8	2	2
LRRC8E	2	2
TUBB4A	2	2
AMZ1	2	2
MROH6	2	2
DIS3L2	2	2
ERV3-1	2	2
MLF1IP	2	2
DUSP11	2	2
C2CD2	2	2
REM1	2	2
PCBP3	2	2
TIMM22	2	2
MRPL51	2	2
KRT33A	2	2
IFT27	2	2
ARHGAP11A	2	2
MORN4	2	2
LGR6	2	2
FAM209A	2	2
PITPNM1	2	2
HIST1H2BB	2	2
PURA	2	2
RAPGEF5	2	2
ECSIT	2	2
PGF	2	2
SREBF2	2	2
EFCAB6	2	2
EMILIN2	2	2
ANAPC16	2	2
SHC4	2	2
PTPN18	2	2
PCDHB1	2	2
PIH1D2	2	2
RAB38	2	2
UBOX5	2	2
LGALS14	2	2
SFXN4	2	2
OR8S1	2	2
SESTD1	2	2
COX5A	2	2
CCDC22	2	2
LAMC1	2	2
DEFB114	2	2
ATHL1	2	2
ENPP1	2	2
GRIN2B	2	2
SLC2A2	2	2
FAM71C	2	2
SSH3	2	2
ZNF446	2	2
OR51D1	2	2
PRRC2A	2	2
HELZ	2	2
EXOSC3	2	2
CD24	2	2
BPIFA2	2	2
TCF7L2	2	2
SLC25A46	2	2
TRDN	2	2
CES4A	2	2
KRTAP10-3	2	2
TEX14	2	2
ZNF513	2	2
LIPC	2	2
ELTD1	2	2
ZNF236	2	2
VASP	2	2
USP44	2	2
ERAP1	2	2
MEF2D	2	2
NAPSA	2	2
AXIN2	2	2
GPER1	2	2
PKIG	2	2
SPAM1	2	2
STOM	2	2
VSTM4	2	2
PRR12	2	2
MORN2	295703	1
hsa-mir-711	262071	1
TTYH1	218911	1
BTN3A2	212877	1
PPAP2B	210618	1
RIMKLB	170322	1
CYB561A3	93768	1
COL24A1	83849	1
ATXN7L3	69542	1
NR1H3	67538	1
ASTL	42256	1
RTDR1	37263	1
GAPDHS	30929	1
NonTargetingControlGuideForHuman_0509	30880	1
RNF138	21394	1
ENTPD8	18634	1
TEF	17714	1
B3GALT6	16578	1
hsa-mir-6165	16441	1
GPR119	16275	1
OR5R1	15973	1
OR10Z1	15327	1
hsa-mir-196b	13884	1
LRRC56	13463	1
NCCRP1	12651	1
WDR7	12492	1
NonTargetingControlGuideForHuman_0106	11671	1
CCDC158	10175	1
PSMD10	9621	1
NAV3	9420	1
ARPC3	8115	1
ATP6V1E2	7543	1
CCNJ	7122	1
TPST1	6989	1
AEBP1	6895	1
NonTargetingControlGuideForHuman_0303	6872	1
SAGE1	6693	1
COPB2	6257	1
CALHM3	6214	1
RSPO4	6115	1
ZDHHC9	6110	1
hsa-mir-6076	5707	1
LOC200726	5626	1
LOC100144595	5360	1
TTC39C	5186	1
P4HTM	4574	1
ZDHHC13	4354	1
STARD13	4033	1
CTNNBL1	3625	1
ENDOG	3385	1
SNX7	3358	1
GAD2	3247	1
PSG5	3201	1
EPHA8	3086	1
IGSF22	3026	1
ACMSD	2826	1
NonTargetingControlGuideForHuman_0621	2812	1
PLEKHB1	2785	1
ARHGEF10L	2619	1
TMED7	2347	1
OVGP1	2270	1
BLNK	2202	1
CT45A5	2175	1
TRAPPC6B	2164	1
BDP1	2131	1
CEACAM7	1982	1
NUTMF	1957	1
SF3B3	1931	1
TIMP3	1925	1
CD55	1919	1
NR6A1	1899	1
MAFB	1884	1
OMD	1860	1
PTCHD4	1853	1
CPN1	1831	1
VGLL3	1696	1
NSMCE2	1661	1
hsa-mir-548ag-1	1640	1
ELP6	1573	1
KRTAP21-1	1567	1
GBP7	1561	1
PYGO2	1551	1
PBX1	1541	1
GHITM	1520	1
ANKRD26	1479	1
ACOT9	1472	1
hsa-mir-937	1446	1
KIRREL2	1434	1
MON1B	1356	1
AGBL4	1337	1
ANKRD12	1298	1
ZFAND2B	1279	1
TMEM223	1268	1
CBR4	1241	1
TFIP11	1199	1
GSN	1196	1
SERTAD3	1187	1
hsa-mir-4747	1131	1
MFAP4	1073	1
TMEM144	1041	1
EIF2AK3	1031	1
hsa-mir-4420	1015	1
TRIM60	1007	1
ZNF641	989	1
FLVCR2	982	1
ZNF614	961	1
AP4B1	952	1
UGT2B10	946	1
FLCN	933	1
WDTC1	922	1
PCDHAC2	919	1
GPATCH3	911	1
CCDC88A	909	1
ZNF658	882	1
PPAPDC3	878	1
HES5	878	1
SCNN1D	849	1
ACPT	827	1
OLAH	820	1
DCHS2	816	1
ZNF343	810	1
KCNH8	810	1
hsa-mir-4795	804	1
HDLBP	779	1
SMARCA4	773	1
hsa-mir-499a	759	1
TRIM65	756	1
GPR75	748	1
CLCNKA	735	1
VNN1	705	1
SPEF1	685	1
TLCD2	681	1
AGPAT3	646	1
LMO1	644	1
TST	631	1
CALCA	618	1
FAM103A1	557	1
SPNS1	555	1
NonTargetingControlGuideForHuman_0161	551	1
TUBGCP2	551	1
TCFL5	538	1
CLK2	525	1
hsa-mir-2116	518	1
hsa-mir-548h-3	517	1
MAPKAPK2	513	1
ASCL5	509	1
CDIP1	499	1
FBXO11	496	1
FBF1	493	1
LEPROTL1	492	1
DLL1	489	1
hsa-mir-5689	487	1
OR5AU1	480	1
MAN2B1	426	1
CCDC74B	408	1
MYCBPAP	403	1
TMEM225	397	1
hsa-mir-148b	393	1
LIX1L	393	1
ARFGAP3	373	1
hsa-mir-103b-2	370	1
C15orf41	360	1
MMAB	360	1
SLC5A5	355	1
PHACTR3	352	1
CLOCK	351	1
TMEM50B	348	1
PI4K2A	347	1
SMCO4	347	1
hsa-mir-194-1	340	1
MICALCL	337	1
ZNF853	336	1
CDK15	332	1
CACNG8	326	1
KCNK4	322	1
SLC7A2	319	1
HMGXB4	319	1
SLC18B1	318	1
RGS3	318	1
OR10A5	317	1
GBF1	306	1
C1orf105	297	1
TMX1	290	1
PCDP1	289	1
FAM219A	286	1
PRAMEF4	282	1
C6orf203	281	1
NKTR	277	1
hsa-mir-3936	260	1
FCGR1B	259	1
KYNU	254	1
GRHL2	254	1
BROX	253	1
AHCYL2	251	1
hsa-mir-4452	246	1
SLC25A14	241	1
C2orf71	230	1
CPSF3	230	1
ATF6B	229	1
HDHD2	228	1
H2AFY	228	1
CCL22	227	1
NFU1	225	1
NXPE2	223	1
WHAMM	220	1
EIF4A1	218	1
TIAM2	217	1
GBP5	213	1
OR8B12	210	1
STX11	207	1
NonTargetingControlGuideForHuman_0327	206	1
PBXIP1	205	1
UBE2I	202	1
RTN4RL2	202	1
BDNF	197	1
TTC3	197	1
FSTL1	192	1
AGAP7	189	1
REV3L	189	1
NEU1	185	1
DRAP1	185	1
GFRA3	184	1
HSD17B12	183	1
SLC52A1	181	1
OR11G2	181	1
CHST4	181	1
DGKZ	180	1
STAU2	176	1
TPBG	174	1
hsa-mir-1538	169	1
CLIC1	168	1
PLOD3	163	1
OR2V2	163	1
BTN2A1	162	1
NLRP10	162	1
hsa-mir-1273g	159	1
CSN3	158	1
RSPRY1	155	1
IL8	150	1
NonTargetingControlGuideForHuman_0832	148	1
LOC100132146	148	1
SLC37A1	148	1
BECN1	148	1
MNT	147	1
OR6X1	146	1
NT5C1A	146	1
UBXN7	144	1
TPPP	142	1
JAKMIP3	141	1
HOXC13	141	1
PPFIBP2	137	1
hsa-mir-3935	135	1
TNNC2	131	1
ZNF135	131	1
hsa-mir-4540	128	1
AMICA1	128	1
APOC2	128	1
TTLL10	127	1
SLC41A3	125	1
STT3B	125	1
THSD4	125	1
MYO1G	124	1
SLC2A6	122	1
PTPRZ1	120	1
OR7G1	120	1
NonTargetingControlGuideForHuman_0823	119	1
LRRN2	118	1
ERVV-1	117	1
TCP10L2	115	1
NPC2	113	1
2020-09-09	113	1
C17orf104	112	1
CFHR2	112	1
KRT6A	111	1
EPAS1	110	1
AKAP8L	109	1
NonTargetingControlGuideForHuman_0764	108	1
AGGF1	108	1
ROCK1	106	1
KPNA3	105	1
CALML6	105	1
GPR22	105	1
FAM110B	104	1
KIF27	103	1
DAGLB	103	1
AZI2	102	1
FREM3	102	1
MRPL1	102	1
SLC25A32	102	1
GAS7	102	1
PABPN1	99	1
C20orf166	99	1
hsa-mir-129-1	98	1
HARS2	98	1
ALOXE3	98	1
NonTargetingControlGuideForHuman_0228	97	1
RBM12	97	1
DTD1	96	1
TMEM242	95	1
ITGA6	94	1
TRIT1	94	1
STK17B	93	1
PRKAG2	92	1
JRKL	92	1
ADAM32	91	1
POU6F2	91	1
NLRP11	90	1
ZNF347	90	1
NOS1AP	90	1
SOCS2	90	1
CCL25	89	1
RAG2	88	1
TP73	87	1
PIR	86	1
MAP10	86	1
hsa-mir-3664	85	1
AQP4	85	1
ZNF267	85	1
SMIM5	85	1
hsa-mir-4310	84	1
NonTargetingControlGuideForHuman_0618	83	1
CCNI	83	1
RNF44	83	1
MCL1	83	1
PYGO1	82	1
TPRKB	82	1
F8A3	80	1
CDC14B	80	1
PPP1CC	79	1
ERCC5	78	1
RXFP4	78	1
CARD14	78	1
MRPL43	78	1
KIAA0556	78	1
CAPN15	77	1
BCL2	77	1
ZNF548	77	1
PRR3	77	1
TUBB3	77	1
MMP28	76	1
TRUB2	75	1
NAA35	74	1
HOXC8	74	1
NAP1L3	74	1
TJP1	74	1
LACTB	73	1
CCDC8	73	1
EIF3M	73	1
NLGN4X	73	1
ACCSL	72	1
GPR171	72	1
PDZD7	71	1
PGK1	71	1
TOP2B	70	1
TMEM129	70	1
MACF1	69	1
OSM	69	1
ZNF563	68	1
CD74	68	1
SNTG2	67	1
SSFA2	67	1
CNNM1	66	1
BCL2L2-PABPN1	65	1
UBXN10	65	1
OR2C1	64	1
C2orf44	64	1
VPS4B	64	1
TSPAN2	64	1
METTL23	64	1
THEGL	63	1
NUDT15	63	1
NRL	62	1
SYNDIG1	62	1
VAT1	62	1
GYG1	62	1
FGF16	61	1
MLL	60	1
CAMK2B	60	1
PODNL1	60	1
URGCP-MRPS24	59	1
FAXDC2	59	1
CLCN2	59	1
LSM14B	59	1
PTPMT1	59	1
APBA1	58	1
PEMT	58	1
UMPS	58	1
UGT2B15	57	1
SRSF10	57	1
FKRP	57	1
PRPF6	57	1
KLHL20	57	1
LTC4S	56	1
HOXB13	56	1
DNMT3L	56	1
RSPH3	56	1
CDK18	56	1
PRSS3	56	1
hsa-mir-618	55	1
ARHGAP32	55	1
LUZP1	55	1
COL6A3	55	1
TRPM8	55	1
USP14	55	1
LECT1	55	1
HSPH1	54	1
DYRK1B	54	1
PALD1	54	1
FAM71F1	53	1
DNAJA2	53	1
TAF1D	53	1
FST	52	1
ZHX2	52	1
AGRP	52	1
HEMGN	52	1
C20orf197	52	1
POLD2	52	1
PTBP1	51	1
BMPER	51	1
A4GNT	51	1
ZNF600	50	1
MT3	50	1
SPIN3	50	1
NonTargetingControlGuideForHuman_0790	49	1
TSPY2	49	1
MSH6	49	1
FNDC3A	49	1
YWHAB	48	1
PABPC1L	48	1
HOXB2	48	1
PPP1R16A	48	1
COX6B2	48	1
ATPIF1	48	1
NonTargetingControlGuideForHuman_0074	47	1
EML2	47	1
PEX7	47	1
hsa-mir-3913-1	46	1
TTLL7	46	1
IFITM3	46	1
NonTargetingControlGuideForHuman_0609	45	1
CASD1	45	1
TSSK2	45	1
SLX4IP	44	1
NCALD	44	1
MAGEA2	43	1
hsa-mir-6728	43	1
USP45	43	1
DFFA	43	1
EP300	43	1
SLFN13	43	1
hsa-mir-4797	42	1
GFOD1	42	1
OR11H12	41	1
hsa-mir-6878	40	1
OSBPL6	40	1
C10orf82	40	1
CPLX1	40	1
UQCC	39	1
hsa-mir-1281	39	1
HIST3H3	39	1
ZDHHC6	39	1
FCRL5	39	1
TECPR1	39	1
SRSF11	39	1
KIAA1279	39	1
NonTargetingControlGuideForHuman_0026	38	1
OR8K1	38	1
SEC14L4	38	1
CCR4	38	1
hsa-mir-4325	37	1
hsa-mir-6832	37	1
FAM71B	37	1
DAZL	37	1
ZNF726	37	1
MOSPD2	37	1
MTUS2	37	1
IQCJ	36	1
SLC51B	36	1
PRY2	35	1
hsa-mir-4526	35	1
GAD1	35	1
ECI2	35	1
CLDN18	35	1
DTD2	34	1
CIB4	34	1
TAC1	34	1
MCM9	34	1
HNRNPA0	34	1
FHDC1	34	1
COL11A2	34	1
ZNF177	33	1
TRMT10C	33	1
OR10P1	33	1
LOC147646	32	1
KLHL2	32	1
C19orf71	32	1
FAM26F	32	1
FAM154A	32	1
hsa-mir-371a	31	1
UQCRFS1	31	1
SNF8	31	1
BEST3	31	1
OR5AC2	31	1
LOXHD1	31	1
TLN2	31	1
SLC17A9	31	1
RNF32	31	1
PALM2	30	1
SLC2A9	30	1
MGA	30	1
ZFP82	30	1
COCH	29	1
RELL1	29	1
LYPLAL1	29	1
ABLIM2	29	1
CT47A5	28	1
hsa-mir-621	28	1
MTX2	28	1
OTP	28	1
VSTM5	28	1
LRIT3	28	1
DST	28	1
OCM	27	1
CD180	27	1
ADIRF	27	1
RNASE11	27	1
ZBTB46	26	1
DMBT1	26	1
AIF1L	26	1
C10orf128	26	1
C13orf35	26	1
LSR	26	1
HNRNPLL	25	1
hsa-mir-3941	25	1
PSAT1	25	1
PXK	25	1
CLN5	25	1
NMBR	25	1
PIP4K2C	25	1
CARD8	25	1
UBE2O	25	1
HSPA13	25	1
STAT4	25	1
NonTargetingControlGuideForHuman_0139	24	1
hsa-let-7f-1	24	1
RNASEL	24	1
GBP6	24	1
ZNF555	24	1
ZRANB2	24	1
MT4	24	1
GTF2A1	24	1
KIAA2018	24	1
PPM1N	24	1
LOC402160	24	1
GALK2	24	1
OR56A4	24	1
hsa-mir-1825	23	1
hsa-mir-3657	23	1
TMEM159	23	1
CDH1	23	1
CRIP2	23	1
TNFRSF1A	23	1
TRIM9	23	1
TXNIP	23	1
CTDNEP1	23	1
GPX5	23	1
PHEX	23	1
DENND1C	23	1
ELK4	23	1
TRAPPC1	23	1
C1D	23	1
TMEM168	23	1
CYP2C18	23	1
hsa-mir-4485	22	1
JUND	22	1
PNPLA4	22	1
OR5B12	22	1
SPP1	22	1
CHRND	22	1
FAM217B	22	1
KLHDC2	22	1
LRRC72	22	1
hsa-mir-4254	21	1
hsa-mir-6862-2	21	1
SPAG11B	21	1
DKK4	21	1
SIGLEC6	21	1
ZFYVE21	21	1
BIN3	21	1
KIAA0355	21	1
RFXAP	21	1
CCNH	21	1
MYOD1	21	1
KRTAP6-3	21	1
RPL35	21	1
DYDC2	21	1
AHRR	21	1
ZNF148	21	1
hsa-mir-6511b-2	20	1
hsa-mir-521-2	20	1
hsa-mir-329-2	20	1
hsa-mir-3663	20	1
OR13J1	20	1
SH2D7	20	1
VPS9D1	20	1
MCM5	20	1
C3orf17	20	1
TMEM187	20	1
KLHL21	20	1
RGS2	20	1
KCNJ11	20	1
GMPR2	20	1
PDZD3	20	1
TMEM196	20	1
MYOM3	20	1
CD1B	20	1
TPCN2	20	1
RTN2	20	1
PATZ1	20	1
OR6N1	20	1
hsa-mir-449c	19	1
hsa-mir-204	19	1
C5orf24	19	1
CRYBA1	19	1
CACYBP	19	1
CEP70	19	1
MADD	19	1
NELFCD	19	1
VPS45	19	1
DEFB125	19	1
UCN3	19	1
HSPA6	19	1
ZNF721	19	1
SOX15	19	1
UQCRH	19	1
NonTargetingControlGuideForHuman_0326	18	1
hsa-mir-2113	18	1
NAPG	18	1
hsa-mir-4720	18	1
DCSTAMP	18	1
EMR1	18	1
DPH3P1	18	1
GPR3	18	1
KTI12	18	1
NDUFB5	18	1
PDE2A	18	1
PPM1H	18	1
RPL37	18	1
NBEAL2	18	1
CDH24	18	1
MPG	18	1
GUSB	18	1
TEN1	18	1
RABAC1	18	1
TRIM16L	18	1
SPATA31A3	17	1
hsa-mir-194-2	17	1
hsa-mir-3165	17	1
RBM4	17	1
FTSJD2	17	1
TNNT1	17	1
SLC6A20	17	1
FAM20A	17	1
TYW1	17	1
NXPH2	17	1
RRNAD1	17	1
LGALS4	17	1
IRX5	17	1
DHCR7	17	1
RPLP1	17	1
BLM	17	1
FBXO36	17	1
C12orf42	17	1
ESRRB	17	1
CXCL10	17	1
hsa-mir-1260a	16	1
GNG13	16	1
HSPA1L	16	1
PYY	16	1
RAB3IP	16	1
OGN	16	1
NFATC2	16	1
SUCLG2	16	1
SLC36A3	16	1
LCE1C	16	1
ATG9A	16	1
TIMM10	16	1
SPRYD3	16	1
RGS1	16	1
URI1	16	1
LAT	16	1
hsa-mir-3913-2	15	1
NUP98	15	1
SPATA25	15	1
RECQL	15	1
ARL6IP1	15	1
TSTD3	15	1
SRSF8	15	1
RFC5	15	1
TUBB2B	15	1
SOLH	15	1
TPM1	15	1
SMAGP	15	1
GRXCR1	15	1
SPARC	15	1
MMP12	15	1
SLC44A2	15	1
C3orf35	15	1
PAQR8	15	1
TPM3	15	1
FEZ1	15	1
NonTargetingControlGuideForHuman_0429	14	1
hsa-mir-604	14	1
ACYP1	14	1
ZNF775	14	1
ADAR	14	1
GLTPD2	14	1
HYAL4	14	1
PRPF40A	14	1
C20orf195	14	1
RGAG4	14	1
TKTL1	14	1
SRSF9	14	1
ST6GALNAC1	14	1
SRPK1	14	1
PLEKHM3	14	1
TSHZ3	14	1
LOC728392	14	1
ANKDD1B	14	1
RNF145	14	1
FIGF	14	1
RERGL	14	1
ZNF814	14	1
PPIF	14	1
CD70	14	1
NonTargetingControlGuideForHuman_0955	13	1
CT47A9	13	1
DDA1	13	1
hsa-mir-6887	13	1
VPS37B	13	1
PSKH1	13	1
SEMA5B	13	1
FTMT	13	1
MTERFD3	13	1
POU4F2	13	1
FAN1	13	1
FGF6	13	1
PSMC4	13	1
DPP9	13	1
ITIH4	13	1
ZC2HC1A	13	1
SMS	13	1
LY96	13	1
SAMD15	13	1
CLDN3	13	1
SNRPN	13	1
EDNRA	13	1
TNFRSF25	13	1
MYEF2	13	1
MYRIP	13	1
DUSP9	13	1
EGFL8	13	1
CCDC170	13	1
FPR1	13	1
PROM1	13	1
C3orf83	12	1
hsa-mir-6751	12	1
hsa-mir-1915	12	1
hsa-mir-5187	12	1
SLC16A12	12	1
GAL3ST2	12	1
NUP107	12	1
AMOTL2	12	1
TRPM7	12	1
GCNT2	12	1
TDRD9	12	1
CEP120	12	1
CBLB	12	1
ZNF280B	12	1
DNAJA3	12	1
ZNF655	12	1
EIF4E2	12	1
DMRTC2	12	1
ZSCAN1	12	1
C4orf22	12	1
OR6C75	12	1
CGA	12	1
ACSM2A	12	1
MAPKAPK3	12	1
MRGPRX2	12	1
UPP1	12	1
OR4D2	12	1
UFC1	12	1
CD99L2	12	1
RECQL5	12	1
PON3	12	1
ALKBH1	12	1
FZD6	12	1
CNPY4	12	1
IRAK4	12	1
NonTargetingControlGuideForHuman_0924	11	1
hsa-mir-548o	11	1
CXorf51A	11	1
hsa-mir-96	11	1
hsa-mir-154	11	1
ZNF254	11	1
COL19A1	11	1
SDC4	11	1
NUBP2	11	1
LCE3A	11	1
GNGT2	11	1
OR6C65	11	1
RPP14	11	1
MBL2	11	1
HIST1H2BM	11	1
JAK3	11	1
TNRC6B	11	1
SH3BGRL3	11	1
CALN1	11	1
FBXO8	11	1
BCL7C	11	1
CLDN2	11	1
SLC25A33	11	1
ZNF467	11	1
TBC1D19	11	1
TAS1R3	11	1
LY86	11	1
ZFPM1	11	1
KRTAP1-4	11	1
AHR	11	1
HSD17B14	11	1
STAT5B	11	1
BANK1	11	1
SRM	11	1
LPHN3	11	1
ITGB5	11	1
NonTargetingControlGuideForHuman_0916	10	1
hsa-mir-4504	10	1
hsa-mir-5003	10	1
hsa-mir-218-2	10	1
PCDHA2	10	1
CCL4L2	10	1
RAB36	10	1
FKBP9	10	1
ELMOD1	10	1
JMJD4	10	1
BEND2	10	1
TAP2	10	1
SMC3	10	1
CCDC68	10	1
POLR1A	10	1
LAPTM5	10	1
VPS39	10	1
TRIM77	10	1
CLCA2	10	1
ANGPTL6	10	1
EML5	10	1
KRTAP5-4	10	1
ZNF581	10	1
FAM46D	10	1
KLHL1	10	1
LDLR	10	1
ZKSCAN3	10	1
METTL22	10	1
TMEM74B	10	1
RFX1	10	1
CEACAM5	10	1
B4GALT1	10	1
PSMC3IP	10	1
NonTargetingControlGuideForHuman_0159	9	1
NonTargetingControlGuideForHuman_0086	9	1
NonTargetingControlGuideForHuman_0627	9	1
NonTargetingControlGuideForHuman_0468	9	1
SPDYE2B	9	1
hsa-mir-3688-2	9	1
hsa-mir-4793	9	1
CCZ1B	9	1
hsa-mir-8087	9	1
hsa-mir-4646	9	1
hsa-mir-4698	9	1
hsa-mir-4281	9	1
hsa-mir-17	9	1
FAM196A	9	1
SCD5	9	1
DAPL1	9	1
KIF20A	9	1
CCKAR	9	1
NRGN	9	1
PPIB	9	1
ZBBX	9	1
GSE1	9	1
ZNF772	9	1
PNPLA7	9	1
IL19	9	1
MRAP2	9	1
DAK	9	1
COX7A1	9	1
TXNL1	9	1
SLC16A13	9	1
ALKBH2	9	1
ETV3L	9	1
TXNDC9	9	1
IL11RA	9	1
TBXA2R	9	1
FGF3	9	1
LRRC10	9	1
CSF2RB	9	1
GLT6D1	9	1
TKTL2	9	1
UPK3A	9	1
SOAT1	9	1
BLVRB	9	1
SLC25A19	9	1
BHLHB9	9	1
TMEM214	9	1
HPS5	9	1
MKNK1	9	1
UTP14C	9	1
PLSCR2	9	1
MESDC1	9	1
DEF6	9	1
GLYATL3	9	1
TCOF1	9	1
ANGEL1	9	1
CBFA2T2	9	1
DRP2	9	1
ATXN1	9	1
KRTAP19-4	9	1
ITPKA	9	1
TBC1D3G	8	1
TBC1D3	8	1
DEFB103A	8	1
hsa-mir-6788	8	1
hsa-mir-4525	8	1
TBC1D28	8	1
hsa-mir-6881	8	1
KIAA1598	8	1
TMEM160	8	1
TEX101	8	1
ENO3	8	1
BUD31	8	1
GHDC	8	1
C2CD4B	8	1
ATXN3L	8	1
WBSCR16	8	1
ST6GALNAC6	8	1
PDE6A	8	1
CORIN	8	1
TREML1	8	1
SMARCAD1	8	1
GNPAT	8	1
ABCA12	8	1
GUCA1A	8	1
AIG1	8	1
GALR2	8	1
NIPBL	8	1
LYZL6	8	1
GSTA1	8	1
HEXDC	8	1
EML4	8	1
RNF2	8	1
MEA1	8	1
CKLF	8	1
C3orf38	8	1
TLDC1	8	1
TMEM249	8	1
CLASP1	8	1
ANXA11	8	1
LMF2	8	1
CYP4F8	8	1
PRKAR1B	8	1
LUM	8	1
STOX1	8	1
C1orf172	8	1
RGS9BP	8	1
CENPF	8	1
B9D2	8	1
COQ4	8	1
NUDT14	8	1
LEFTY1	8	1
LBR	8	1
HUS1B	8	1
ZNF605	8	1
RS1	8	1
DCD	8	1
MAATS1	8	1
RNF170	8	1
HIST1H2BE	8	1
CIR1	8	1
CNR1	8	1
ANKRD49	8	1
RASGRF1	8	1
LYG1	8	1
QRICH1	8	1
PPP1R15B	8	1
HHIPL1	8	1
TCP10L	8	1
CADPS2	8	1
GGACT	8	1
C5orf60	8	1
NonTargetingControlGuideForHuman_0466	7	1
NonTargetingControlGuideForHuman_0961	7	1
NonTargetingControlGuideForHuman_0540	7	1
NonTargetingControlGuideForHuman_0932	7	1
TRIM73	7	1
hsa-mir-5192	7	1
OR2W1	7	1
KLRC3	7	1
HDAC3	7	1
FRRS1	7	1
MED20	7	1
NAA16	7	1
ACER2	7	1
PLSCR4	7	1
MTRNR2L2	7	1
MSRB2	7	1
SLC19A3	7	1
CDC23	7	1
CASR	7	1
KCNMB2	7	1
CDC42BPG	7	1
ADCY7	7	1
MRPS18C	7	1
SGSM2	7	1
DIRAS2	7	1
HNF4G	7	1
BPHL	7	1
SNX17	7	1
DIO1	7	1
MAST2	7	1
ZNF506	7	1
PPL	7	1
RPP25	7	1
NDUFB1	7	1
COL4A4	7	1
PAQR6	7	1
BMP6	7	1
COMMD7	7	1
SLC17A1	7	1
[truncated: 1,420 more rows]
