# Supplementary material for: TMEM79/MATTRIN defines a pathway for Frizzled regulation and is required for Xenopus embryogenesis
Source: eLife. 2020 Sep 14;9:e56793. doi: 10.7554/eLife.56793 (PMC7521923; doi:10.7554/eLife.56793)
Supplement: Figure 3—figure supplement 1—source data 1. [file elife-56793-fig3-figsupp1-data1.xlsx]

## Sheet: Figure3_T79-IWP2.csv
Figure S3C
EV	T79KO	ZRKO
1.13596	29.9553	46.7207
0.876554	27.9269	45.3941
0.987486	37.0748	46.6337
Figure S3D
	DMSO			IWP-2	IWP-2	IWP-2
Parental	1.0354	1.05885	0.90575	1.1226	0.698408	1.03524
T79KO	3.91279	3.05473	3.62113	1.67262	1.51052	1.47204
ZRKO	3.09489	1.77235	2.91729	1.42049	1.13775	1.23906
	DMSO	DMSO	DMSO	IWP-2	IWP-2	IWP-2
Parental	0.97566	0.988194	1.03615	0.559338	0.563223	0.571837
T79KO	1.34942	1.3688	1.44867	0.766652	0.804015	0.809245
ZRKO	1.37994	1.43609	1.43881	0.810462	0.83986	0.865968
