# Supplementary material for: TMEM79/MATTRIN defines a pathway for Frizzled regulation and is required for Xenopus embryogenesis
Source: eLife. 2020 Sep 14;9:e56793. doi: 10.7554/eLife.56793 (PMC7521923; doi:10.7554/eLife.56793)
Supplement: Figure 3—source data 1. [file elife-56793-fig3-data1.xlsx]

## Sheet: Figure3_T79-IWP2.csv
Figure 3A
	DMSO			IWP-2	IWP-2	IWP-2
siCtrl	0.707549	1.18279	1.10966	0.517707	0.432091	0.478258
siTMEM79	24.0556	15.385	20.3287	0.415432	0.345161	0.293887
Figure 3C
WT/Parental	T79KO	ZRKO	FZD null
1	1.64598	1.75308	0.169772
1	2.11838	2.15792	0.286766
Figure 3D
ZRKO				T79KO
EV	TMEM79	ZNRF3		EV	TMEM79	ZNRF3
1.04591	0.253143	0.375726		0.931093	0.144869	0.0725321
0.947678	0.202457	0.314855		0.926047	0.171011	0.0878793
1.00641	0.239206	0.358114		1.14377	0.158682	0.14091
Figure 3E
T79KO		ZRKO
siCtrl	siZNRF3	siCtrl	siT79
1.34201	2.03755	1.01521	3.66492
0.834605	2.00955	0.915029	3.49473
0.823386	1.68896	1.06976	3.30669
