# Supplementary material for: TMEM79/MATTRIN defines a pathway for Frizzled regulation and is required for Xenopus embryogenesis
Source: eLife. 2020 Sep 14;9:e56793. doi: 10.7554/eLife.56793 (PMC7521923; doi:10.7554/eLife.56793)
Supplement: Figure 5—figure supplement 1—source data 1. [file elife-56793-fig5-figsupp1-data1.xlsx]

## Sheet: Figure S5.csv
Parental	USP8KO
EV	EV	ZNRF3
1.06368	16.7989	5.95972
0.792976	16.939	5.11538
1.14334	17.1947	3.51064
