# Supplementary material for: TMEM79/MATTRIN defines a pathway for Frizzled regulation and is required for Xenopus embryogenesis
Source: eLife. 2020 Sep 14;9:e56793. doi: 10.7554/eLife.56793 (PMC7521923; doi:10.7554/eLife.56793)
Supplement: Figure 5—source data 1. [file elife-56793-fig5-data1.xlsx]

## Sheet: Figure3_T79-IWP2.csv
Figure 5B
DMSO		IWP-2				USP8C
EV	USP8C	EV	USP8C		EV	EV	Tmem79-dose-1	Tmem79-dose-2	Tmem79-dose-3
1.01357	16.2012	0.571636	0.815554		1.12545	7.87523	1.99239	1.19755	0.716135
1.1281	21.6686	0.490286	1.01954		0.868973	7.35461	2.03503	1.16639	0.948859
0.858327	18.0776	0.441832	1.01702		1.00558	12.3459	2.26302	1.72402	0.931723
Figure 5G
	Parental cells			USP8KO
EV	1.07582	0.857312	1.06686	1.13477	0.946608	0.918621
EV	26.8209	22.1733	27.2702	7.18195	5.94985	6.87254
Tmem79-30ng	18.2232	15.9276	18.3173	7.8141	7.00116	8.54241
Tmem79-60ng	8.82519	6.63659	7.40223	9.95036	7.64288	9.1257
